# Supplementary material
Source: Copernicus journal article supplement (doi:10.5194/egusphere-2026-1891)
Supplement: Supplementary file 1 [file egusphere-2026-1891-supplement.pdf]

## **S1. Calibrations**

We homogenized the SST assessments across the study area by applying the MgCaRB calibration (Gray et al., 2018) for Mg/Ca and the BAYSPLINE calibration (J. E. Tierney & Tingley, 2018) for  $U_{37}^{K'}$  (Jonkers et al., accepted). In rare cases, where raw data were not available, it was necessary to back-calculate Mg/Ca or  $U_{37}^{K'}$  from published SST data before applying the global calibrations.

While the results of  $U_{37}^{K'}$ -SSTs from the application of the original and homogenized calibration equations are mostly within error (Fig. S1), Mg/Ca-derived SSTs (original vs. homogenized) partly show large deviations (Fig. S1). These likely result from the consideration of potential salinity and alkalinity changes in homogenized SSTs from the different core sites, which are not considered in (most) original calibrations. Of all records, 36 Mg/Ca and 24  $U_{37}^{K'}$  records extend into the Common Era (CE). For these records, we calculated mean CE SSTs and compared the results to the COBE SSTs (Fig. S2). We find that SSTs calculated with the original calibrations show smaller offsets (calculated as mean absolute deviations from the COBE SSTs) than the homogenized SSTs (Tables S.2 and S3). Furthermore, the application of the MgCaRB calibration also leads to a larger site to site variability of SST estimates and an enhanced mismatch between  $U_{37}^{K'}$  and Mg/Ca-derived SSTs (Fig. S3). We therefore base our analysis of proxy-derived SST anomalies on the SST assessments that result from the application of the calibration equations used in the original publications of the records.

## **S2. Age models**

The age models of the records included in the PalMod data synthesis v2 (Jonkers et al., accepted) base on a combination of absolute age control points from tephra layers, from radiocarbon dates, and the alignment of benthic foraminifera  $\delta^{18}O$  records to regional benthic  $\delta^{18}O$  stacks (Lisiecki & Stern, 2016). All radiocarbon ages were converted to calendar ages using the IntCal20 calibration curve (Reimer et al., 2020). To account for the variability of marine reservoir ages in space and time, the reservoir age estimates of the comprehensive ocean general circulation model of Butzin et al. (2017) were applied. To avoid inflating confidence in the tuned age models and to ensure comparability between different cores, tie points were preferentially set at the position of marine isotope stage boundaries. Uncertainty estimates of the tie points are based on the chronological uncertainty of the  $\delta^{18}O$  stacks, as reported by Lisiecki and Stern (2016).

## **S3. Model simulations**

The atmosphere is represented by the Community Atmosphere Model (CAM5) with a horizontal resolution of  $1.9 \times 2.5^\circ$  and 30 vertical levels, while the ocean model (POP2) has a nominal resolution of  $1^\circ$  with 60 depth levels. The ocean grid is refined meridionally near the equator ( $\sim 0.26^\circ$ ) to improve simulation accuracy in this dynamically active region. CESM further includes the Community Land Model (CLM4), which uses a nominal  $2^\circ$  grid in our simulations. CLM4 does not include a fully dynamic vegetation, such that the spatial distributions of plant functional types (PFT) are prescribed. However, CLM4 runs with a prognostic phenology provided by its

carbon-nitrogen cycle model, such that the simulation of leaf and stem area indices as well as vegetation height is interactive.

**Table S1.** Summary of SST records used in this study.

| Site           | Longitude | Latitude | Water depth | Proxy | Reference dois <sup>1</sup>                                                                | References <sup>1</sup>                                                            |
|----------------|-----------|----------|-------------|-------|--------------------------------------------------------------------------------------------|------------------------------------------------------------------------------------|
| 130-806B       | 159.36    | 0.32     | 2519.9      | Mg/Ca | 10.1126/science.1115933                                                                    | Medina-Elizalde and Lea (2005)                                                     |
| 167-1014       | -119.98   | 32.83    | 1165.8      | UK'37 | 10.1029/2004GL020138                                                                       | Yamamoto et al. (2004)                                                             |
| 167-1019C      | -124.93   | 41.68    | 946.9       | UK'37 | 10.1029/2002PA000768                                                                       | Barron et al. (2003)                                                               |
| 184-1143       | 113.29    | 9.36     | 2772.3      | UK'37 | 10.1016/j.epsl.2011.04.016                                                                 | Li et al. (2011)                                                                   |
| 184-1146       | 116.27    | 19.46    | 2091.5      | UK'37 | 10.1126/science.1185435                                                                    | Herbert et al. (2010)                                                              |
| 202-1240       | -86.46    | 0.02     | 2920.8      | Mg/Ca | 10.1029/2008PA001620                                                                       | Pena et al. (2008)                                                                 |
| 202-1242       | -83.61    | 7.86     | 1363.7      | Mg/Ca | 10.1029/2005PA001208                                                                       | Benway et al. (2006)                                                               |
| 3cBx           | 139.64    | 8.02     | 2829        | Mg/Ca | 10.1016/j.palaeo.2012.06.002                                                               | Sagawa et al. (2012)                                                               |
| A7             | 127.02    | 28.01    | 1264        | Mg/Ca | 10.1029/2004PA001061                                                                       | Sun et al. (2005)                                                                  |
| AAS-9-21       | 72.65     | 14.51    | 1807        | Mg/Ca | 10.1029/2008PA001687                                                                       | Govil and Naidu (2010)                                                             |
| BJ8-03-13GGC   | 115.2     | 7.45     | 2924        | Mg/Ca | 10.1038/NGEO920                                                                            | Linsley et al. (2010)                                                              |
| BJ8-03-70GGC   | 119.39    | 3.55     | 482         | Mg/Ca | 10.1038/NGEO920                                                                            | Linsley et al. (2010)                                                              |
| GeoB10029-4    | 100.13    | -1.49    | 964         | Mg/Ca | 10.1016/j.epsl.2010.01.024                                                                 | M. Mohtadi, Steinke, et al. (2010)                                                 |
| GeoB10038-4    | 103.25    | -5.94    | 1819        | UK'37 | 10.1016/j.epsl.2010.01.024,<br>10.1016/j.quascirev.2009.12.006                             | M. Mohtadi, Lückge, et al. (2010); M. Mohtadi, Steinke, et al. (2010)              |
| GeoB10042-1    | 104.64    | -7.11    | 2460        | Mg/Ca | 10.1002/2015PA002802                                                                       | Setiawan et al. (2015)                                                             |
| GeoB10043-3    | 105.06    | -7.31    | 2172        | Mg/Ca | 10.1002/2015PA002802                                                                       | Setiawan et al. (2015)                                                             |
| GeoB10069-3    | 120.92    | -9.59    | 1250        | Mg/Ca | 10.1016/j.epsl.2013.11.032                                                                 | Gibbons et al. (2014)                                                              |
| GeoB12605-3    | 39.11     | -5.57    | 195         | Mg/Ca | 10.1002/2013PA002555                                                                       | Kuhnert et al. (2014)                                                              |
| GeoB12610-2    | 39.42     | -4.82    | 399         | Mg/Ca | 10.1002/jqs.2767                                                                           | Rippert et al. (2015)                                                              |
| GeoB12615-4    | 39.84     | -7.14    | 446         | Mg/Ca | 10.5194/cp-10-293-2014                                                                     | Romahn et al. (2014)                                                               |
| GeoB16602      | 113.71    | 18.95    |             | UK'37 | 10.1016/j.epsl.2018.04.046<br>10.1038/s41561-018-0250-1                                    | E. Huang et al. (2018)<br>Cheng et al. (2018)                                      |
| GeoB17426-3    | 150.86    | -2.19    | 1367        | Mg/Ca | 10.1029/2019PA003832                                                                       | Hollstein et al. (2020)                                                            |
| GeoB5844-2     | 34.68     | 27.71    | 963         | UK'37 | 10.1029/2002PA000864                                                                       | Arz et al. (2003)                                                                  |
| GeoB7186-3     | -75.16    | -44.15   | 1169        | UK'37 | 10.1016/j.quascirev.2006.12.008                                                            | Mahyar Mohtadi et al. (2007)                                                       |
| GIK17286-1     | 89.88     | 19.74    | 1428        | UK'37 | 10.1029/2019PA003646                                                                       | Lauterbach et al. (2020)                                                           |
| GIK17748-2     | -72.03    | -32.75   | 2545        | UK'37 | 10.1016/S0277-3791(02)00012-4                                                              | J.-H. Kim et al. (2002)                                                            |
| GIK17927-2     | 119.45    | 17.25    | 2804        | UK'37 | 10.1007/s00531-015-1227-6                                                                  | Sadatzi et al. (2016)                                                              |
| GIK17940-2     | 117.38    | 20.12    | 1727        | UK'37 | 10.1029/1998PA900015                                                                       | Pelejero et al. (1999)                                                             |
| GIK17954-2     | 111.53    | 14.8     | 1520        | UK'37 | 10.1029/1998PA900015                                                                       | Pelejero et al. (1999)                                                             |
| GIK17961-2     | 112.33    | 8.51     | 1795        | UK'37 | 10.1029/1998PA900015;<br>10.1016/S0025-3227(98)00182-0                                     | Pelejero et al. (1999); L. Wang et al. (1999)                                      |
| GIK18287-3     | 110.66    | 5.66     | 598         | UK'37 | 10.1006/qres.2001.2235                                                                     | Steinke et al. (2001)                                                              |
| GIK18471-1     | 129.98    | -9.37    | 485         | Mg/Ca | 10.1016/j.palaeo.2016.09.010                                                               | Cappelli et al. (2016)                                                             |
| Gik18515-3     | 119.36    | -3.63    | 688         | Mg/Ca | 10.1016/j.quascirev.2016.10.018                                                            | Schröder et al. (2016)                                                             |
| GIK18519-2     | 118.11    | -0.57    | 1658        | Mg/Ca | 10.1029/2018PA003323                                                                       | Schröder et al. (2018)                                                             |
| GIK18522-3     | 119.08    | 1.4      | 975         | Mg/Ca | 10.1029/2018PA003323                                                                       | Schröder et al. (2018)                                                             |
| GIK18526-3     | 118.17    | -3.61    | 1524        | Mg/Ca | 10.1029/2018PA003323                                                                       | Schröder et al. (2018)                                                             |
| GIK18540-3     | 119.58    | -6.87    | 1189        | Mg/Ca | 10.1029/2018PA003323                                                                       | Schröder et al. (2018)                                                             |
| KNR195-5-CDH23 | -81.13    | -3.75    | 373         | UK'37 | 10.1002/2015PA002816                                                                       | Bova et al. (2015)                                                                 |
| KNR195-5-CDH26 | -81.31    | -3.99    | 1023        | UK'37 | 10.1002/2015PA002816                                                                       | Bova et al. (2015)                                                                 |
| KT05-7-PC-02   | 140.77    | 41       | 61          | UK'37 | 10.1016/j.quascirev.2008.12.009                                                            | Kawahata et al. (2009)                                                             |
| KX973-21-2     | 157.98    | -1.42    | 1897        | Mg/Ca | 10.1126/sciadv.abc0402;<br>10.1038/s41586-022-05302-y                                      | Dang et al. (2020); Jian et al. (2022)                                             |
| KX973-22-4     | 159.25    | -0.03    | 2362        | Mg/Ca | 10.1007/s00343-017-6082-9;<br>10.1038/s43247-021-00305-5                                   | Zhang et al. (2017); Zhang et al. (2021)                                           |
| LPAZ21P        | -109.47   | 22.98    | 624         | UK'37 | 10.1126/science.1059209                                                                    | Herbert et al. (2001)                                                              |
| M75-3-137-3    | 37.87     | -18.24   | 1339        | UK'37 | 10.1002/palo.20053                                                                         | Y. V. Wang et al. (2013)                                                           |
| M77-2-056-5    | -81.12    | -3.75    | 355         | Mg/Ca | 10.1002/2014PA002706                                                                       | Nürnberg et al. (2015)                                                             |
| M77-2-059-1    | -81.32    | -3.95    | 997         | UK'37 | 10.1002/2014PA002706                                                                       | Nürnberg et al. (2015)                                                             |
| MD01-2378      | 121.79    | -13.08   | 1783        | Mg/Ca | 10.1029/2006PA001278;<br>10.1016/j.epsl.2008.06.029;<br>10.1029/2008PA001653               | Xu et al. (2006); Xu et al. (2008); Zuraida et al. (2009); (Holbourn et al., 2005) |
| MD01-2386      | 129.79    | 1.13     | 2816        | Mg/Ca | 10.1073/pnas.1915510117                                                                    | Jian et al. (2020)                                                                 |
| MD01-2390      | 113.41    | 6.64     | 1545        | Mg/Ca | 10.1016/j.quascirev.2007.12.003                                                            | Steinke et al. (2008)                                                              |
| MD01-2412      | 145       | 44.53    | 1225        | UK'37 | 10.1016/j.gloplacha.2006.01.010                                                            | Harada et al. (2006)                                                               |
| MD01-2421      | 141.78    | 36.02    | 2224        | UK'37 | 10.1029/2004GL021903                                                                       | Yamamoto et al. (2005)                                                             |
| MD02-2529      | -84.12    | 8.21     | 1619        | UK'37 | 10.1038/nature05578                                                                        | Leduc et al. (2007)                                                                |
| MD03-2607      | 137.41    | -36.96   | 865         | UK'37 | 10.1002/palo.20035                                                                         | Lopes dos Santos et al. (2013)                                                     |
| MD03-2611G     | 136.55    | -36.73   | 2420        | UK'37 | 10.1016/j.quascirev.2020.106593                                                            | De Deckker et al. (2020)                                                           |
| MD05-2896      | 111.44    | 8.82     | 1657        | UK'37 | 10.1016/j.yqres.2014.12.003                                                                | Dong et al. (2015)                                                                 |
| MD05-2897      | 111.43    | 8.83     | 1658        | UK'37 | 10.1016/j.yqres.2014.12.003                                                                | Dong et al. (2015)                                                                 |
| MD05-2904      | 116.25    | 19.46    | 2066        | Mg/Ca | 10.1016/j.gloplacha.2011.06.006                                                            | Steinke et al. (2011)                                                              |
| MD05-2920      | 144.53    | -2.86    | 1843        | Mg/Ca | 10.1016/j.quascirev.2013.12.018                                                            | Tachikawa et al. (2014)                                                            |
| MD05-2925      | 151.46    | -9.34    | 1661        | Mg/Ca | 10.5194/cp-10-2253-2014;<br>10.1038/s41598-017-04031-x;<br>10.1016/j.quascirev.2022.107756 | Lo et al. (2014); Lo et al. (2017); Lo et al. (2022)                               |
| MD06-3018      | 166.15    | -23      | 2470        | Mg/Ca | 10.1029/2010PA002019                                                                       | Russon et al. (2011)                                                               |

|               |         |        |      |                  |                                                                              |                                                                            |
|---------------|---------|--------|------|------------------|------------------------------------------------------------------------------|----------------------------------------------------------------------------|
| MD06-3047B    | 124.8   | 17.01  | 2510 | Mg/Ca            | 10.1016/j.palaeo.2017.12.039                                                 | Jia et al. (2018)                                                          |
| MD06-3067     | 126.5   | 6.51   | 1575 | Mg/Ca            | 10.1029/2010PA001966                                                         | Bolliet et al. (2011)                                                      |
| MD06-3075     | 125.83  | 6.48   | 1878 | UK '37           | 10.1002/2013PA002599                                                         | Fraser et al. (2014)                                                       |
| MD10-3340     | 128.72  | -0.52  | 1094 | Mg/Ca            | 10.1126/sciadv.abc0402,<br>10.1038/s41586-022-05302-y                        | Dang et al. (2020); Jian et al. (2022)                                     |
| MD161-17      | 82.02   | 16.06  | 790  | Mg/Ca            | 10.1002/2017GC007075                                                         | Panmei et al. (2017)                                                       |
| MD77-194      | 75.23   | 10.47  | 1222 | UK '37           | 10.1016/S0277-3791(97)00099-1                                                | Sonzogni et al. (1998)                                                     |
| MD79-257      | 36.2    | -20.24 | 1262 | UK '37           | 10.1016/S0277-3791(97)00099-1                                                | Sonzogni et al. (1998)                                                     |
| MD90-963      | 73.53   | 5.04   | 2446 | UK '37           | 10.1016/S0967-0645(97)00008-8                                                | Rostek et al. (1997)                                                       |
| MD96-2048     | 34.02   | -26.17 | 660  | UK '37           | 10.5194/cp-7-1285-2011                                                       | Caley et al. (2011)                                                        |
| MD97-2121     | 177.99  | -40.38 | 3014 | UK '37           | 10.1029/2005PA001191                                                         | Pahnke and Sachs (2006)                                                    |
| MD97-2125     | 161.44  | -22.34 | 1684 | UK '37           | 10.1016/j.quascirev.2008.12.013                                              | Tachikawa et al. (2009)                                                    |
| MD97-2138     | 146.23  | -1.25  | 1900 | UK '37           | 10.1029/2006PA001269                                                         | de Garidel-Thoron et al. (2007)                                            |
| MD97-2140     | 141.76  | 2.04   | 2547 | Mg/Ca            | 10.1038/nature03189                                                          | de Garidel-Thoron et al. (2005)                                            |
| MD97-2141     | 141.29  | 8.79   | 3633 | Mg/Ca            | 10.1029/2001GC000260;<br>10.1029/2000PA000557;<br>10.1029/2021PA004361       | Oppo et al. (2003); de Garidel-Thoron et al. (2001); Weiss et al. (2022)   |
| MD97-2142     | 119.47  | 12.69  | 1557 | UK '37           | 10.3319/TAO.2008.19.4.363(IMAGES)                                            | Shiau et al. (2008)                                                        |
| MD97-2151     | 109.87  | 8.73   | 1598 | UK '37           | 10.1016/j.palaeo.2005.11.033                                                 | Zhao et al. (2006)                                                         |
| MD98-2152     | 103.88  | -6.33  | 1796 | UK '37           | 10.1016/j.epsl.2019.03.038                                                   | Windler et al. (2019)                                                      |
| MD98-2160     | 117.49  | -5.20  | 1185 | Mg/Ca            | 10.1029/2006GL027234                                                         | Newton et al. (2006)                                                       |
| MD98-2161     | 117.49  | -5.22  | 1185 | Mg/Ca            | 10.1016/j.gloplacha.2013.08.017;<br>10.1038/s41598-018-24055-1               | Fan et al. (2013); Fan et al. (2018)                                       |
| MD98-2162     | 117.9   | -4.69  | 1855 | Mg/Ca            | 10.1038/s41586-022-05302-y                                                   | Jian et al. (2022)                                                         |
| MD98-2165     | 118.33  | -9.65  | 2100 | Mg/Ca            | 10.1029/2006GC001514                                                         | Levi et al. (2007)                                                         |
| MD98-2170     | 125.39  | -10.59 | 832  | Mg/Ca            | 10.1126/science.1143791                                                      | Stott et al. (2007)                                                        |
| MD98-2176     | 133.44  | -5     | 2382 | Mg/Ca            | 10.1038/nature02903                                                          | Stott et al. (2004)                                                        |
| MD98-2178     | 118.7   | 3.62   | 1984 | Mg/Ca            | 10.1016/j.gloplacha.2013.08.017;<br>10.1038/s41598-018-24055-1               | Fan et al. (2013); Fan et al. (2018)                                       |
| MD98-2181     | 125.83  | 6.3    | 2114 | Mg/Ca            | 10.1016/j.quascirev.2009.05.007;<br>10.1126/science.1071627                  | Saikku et al. (2009); Stott et al. (2002)                                  |
| MD98-2188     | 123.49  | 14.82  | 730  | Mg/Ca            | 10.1029/2011GL050154                                                         | Dang et al. (2012)                                                         |
| ME0005A-24JC  | -86.46  | 0.02   | 2941 | UK '37           | 10.1038/nature05222;<br>10.1016/j.quascirev.2010.10.012                      | Kienast et al. (2006); Dubois et al. (2011)                                |
| ME0005A-27JC  | -82.79  | -1.85  | 2203 | UK '37           | 10.1016/j.quascirev.2010.10.012                                              | Dubois and Kienast (2011)                                                  |
| ME0005A-43JC  | -83.61  | 7.86   | 1368 | Mg/Ca            | 10.1029/2005PA001208                                                         | Benway et al. (2006)                                                       |
| ODP1012       | -118.38 | 32.28  | 1783 | UK '37           | 10.1126/science.1059209                                                      | Herbert et al. (2001)                                                      |
| ODP1016C      | -122.28 | 34.53  | 3834 | UK '37           | 10.1016/j.quascirev.2006.07.014                                              | Yamamoto et al. (2007)                                                     |
| ODP1020       | -126.43 | 41     | 3042 | UK '37           | 10.2973/odp.proc.sr.167.206.2000;<br>10.1029/98pa00069                       | Heusser et al. (2000); Herbert et al. (1998)                               |
| ODP1239       | -82.08  | -0.67  | 1414 | UK '37           | 10.1029/2009PA001868;<br>10.1002/2015PA002873;<br>10.1016/j.epsl.2010.06.010 | Rincón-Martínez et al. (2010); Dyez et al. (2016); Etourneau et al. (2010) |
| ODP807        | 156.62  | 3.61   | 2804 | Mg/Ca            | 10.1038/s41586-022-05302-y                                                   | Jian et al. (2022)                                                         |
| ODP846        | -90.82  | -3.1   | 3296 | UK '37           | 10.1126/science.1120395                                                      | Lawrence et al. (2006)                                                     |
| P178-15P      | 44.3    | 11.96  | 869  | UK '37,<br>Mg/Ca | 10.1038/NGEO2603                                                             | Jessica E. Tierney et al. (2016)                                           |
| SCS90-36      | 111.49  | 18     | 2050 | UK '37           | 10.1016/S0377-8398(97)00014-5                                                | C.-Y. Huang et al. (1997)                                                  |
| SK157-4       | 78      | 2.67   | 3500 | Mg/Ca            | 10.1029/2005GL024093                                                         | Saraswat et al. (2005)                                                     |
| SK17          | 72.97   | 15.25  | 840  | Mg/Ca            | 10.1029/2007PA001564                                                         | Anand et al. (2008)                                                        |
| SK218-1       | 82      | 14.04  | 3307 | Mg/Ca            | 10.1002/jqs.1392;<br>10.1016/j.quascirev.2011.10.004                         | Naidu and Govil (2010); Govil and Naidu (2011)                             |
| SK237-GC04    | 75      | 10.98  | 1245 | Mg/Ca            | 10.1016/j.epsl.2013.05.022                                                   | Saraswat et al. (2013)                                                     |
| SO139-74KL    | 103.83  | -6.54  | 1690 | UK '37,<br>Mg/Ca | 10.1029/2008PA001627;<br>10.1016/j.quascirev.2018.05.035                     | Lückge et al. (2009)<br>X. Wang et al. (2018)                              |
| SO18480       | 121.65  | -12.06 | 2299 | Mg/Ca            | 10.1126/sciadv.abc0402;<br>10.1038/s41586-022-05302-y                        | Dang et al. (2020); Jian et al. (2022)                                     |
| SO189-119KL   | 96.31   | 3.52   | 808  | Mg/Ca            | 10.1038/nature13196                                                          | M. Mohtadi et al. (2014)                                                   |
| SO189-39KL    | 99.91   | -0.79  | 517  | Mg/Ca            | 10.1038/nature13196                                                          | M. Mohtadi et al. (2014)                                                   |
| SO217-18517-2 | 117.56  | -1.54  | 698  | UK '37,<br>Mg/Ca | 10.1002/2016PA003030                                                         | Hendrizan et al. (2017)                                                    |
| SO42-74KL     | 57.35   | 14.32  | 3212 | UK '37           | 10.1016/j.quascirev.2004.08.010                                              | Jung-Hyun Kim et al. (2004)                                                |
| TR163-19      | -90.95  | 2.26   | 2348 | UK '37,<br>Mg/Ca | 10.1029/2009PA001781;<br>10.1126/science.289.5485.1719                       | Dubois et al. (2009); D. W. Lea et al. (2000)                              |
| TR163-22      | -92.4   | 0.52   | 2830 | Mg/Ca            | 10.1016/j.quascirev.2005.11.010                                              | David W. Lea et al. (2006)                                                 |
| U1429         | 129     | 31.62  | 732  | UK '37           | 10.1038/s41467-018-05814-0                                                   | Clemens et al. (2018)                                                      |
| U1446         | 85.73   | 19.08  | 1440 | Mg/Ca            | 10.1126/sciadv.abg3848;<br>10.1038/s43247-021-00133-7                        | Clemens et al. (2021); Nilsson-Kerr et al. (2021)                          |
| U1448         | 93      | 10.63  | 1097 | Mg/Ca            | 10.1016/j.quascirev.2022.107403;<br>10.1038/s43247-021-00133-7               | Nilsson-Kerr et al. (2022); Nilsson-Kerr et al. (2021)                     |
| V19-27        | -82.07  | -0.47  | 1373 | UK '37           | 10.1029/2008PA001593                                                         | Koutavas and Sachs (2008)                                                  |
| V19-28        | -84.65  | -2.37  | 2720 | UK '37           | 10.1029/2008PA001593                                                         | Koutavas and Sachs (2008)                                                  |
| V19-30        | -83.52  | -3.38  | 3091 | UK '37           | 10.1029/2008PA001593                                                         | Koutavas and Sachs (2008)                                                  |
| W8402A-14     | -138.96 | 0.95   | 4287 | UK '37           | 10.1029/94PA02116                                                            | Jasper et al. (1994)                                                       |
| WIND-28K      | 51.01   | -10.15 | 4157 | Mg/Ca            | 10.1002/2013GC004994;<br>10.1029/2006GL027097                                | Johnstone et al. (2014); Kiefer et al. (2006)                              |

<sup>1</sup>includes references of SST records, radiocarbon dates of the records, and isotope records used to generate the age models.

**Table S2.** Comparison of proxy-based SSTs of the Common Era resulting from (i) the application of the original calibration and (ii) the MgCaRB calibration and COBE SST data. For each record, the calibration that results in SST closer to COBE SST is typed in bold.

| Site                               | COBE SST (°C) | Original SST (°C) | MgCaRB SST (°C) | Original SST – COBE SST (°C) | MgCaRB SST – COBE SST (°C) |
|------------------------------------|---------------|-------------------|-----------------|------------------------------|----------------------------|
| 202-1240                           | 24.6          | 24.7              | 19.0            | <b>0.1</b>                   | -5.5                       |
| 202-1242                           | 28.0          | 26.9              | 26.5            | <b>-1.1</b>                  | -1.6                       |
| A7                                 | 23.8          | 26.7              | 26.9            | <b>2.9</b>                   | 3.1                        |
| AAS-9-21                           | 27.8          | 28.8              | 28.5            | 1.0                          | <b>0.7</b>                 |
| BJ8-03-13GGC                       | 28.3          | 27.4              | 28.6            | -0.9                         | <b>0.3</b>                 |
| GeoB10038-4                        | 28.3          | 25.0              | 26.3            | -3.3                         | <b>-2.0</b>                |
| GeoB10043-3                        | 28.0          | 26.9              | 26.5            | <b>-1.1</b>                  | -1.6                       |
| GeoB10069-3                        | 28.0          | 27.2              | 26.0            | <b>-0.8</b>                  | -2.0                       |
| GeoB12605-3                        | 26.9          | 26.7              | 28.2            | <b>-0.2</b>                  | 1.3                        |
| GeoB12610-2                        | 26.9          | 27.8              | 26.6            | 1.0                          | <b>-0.2</b>                |
| GeoB12615-4                        | 27.0          | 28.6              | 28.0            | 1.6                          | <b>1.0</b>                 |
| GIK18519-2                         | 28.8          | 27.8              | 29.3            | -1.0                         | <b>0.5</b>                 |
| GIK18526-3                         | 28.7          | 28.0              | 29.5            | <b>-0.7</b>                  | 0.8                        |
| M75-3-137-3                        | 26.3          | 24.4              | 24.9            | -1.9                         | <b>-1.4</b>                |
| MD01-2378                          | 28.3          | 27.9              | 28.9            | <b>-0.4</b>                  | 0.6                        |
| MD01-2390                          | 28.2          | 27.6              | 27.4            | <b>-0.6</b>                  | -0.8                       |
| MD05-2904                          | 26.3          | 26.4              | 24.8            | <b>0.1</b>                   | -1.5                       |
| MD05-2925                          | 28.1          | 27.8              | 28.7            | <b>-0.2</b>                  | 0.7                        |
| MD10-3340                          | 28.4          | 28.9              | 28.9            | 0.5                          | <b>0.5</b>                 |
| MD98-2160                          | 28.6          | 28.9              | 30.8            | <b>0.4</b>                   | 2.3                        |
| MD98-2161                          | 28.6          | 27.7              | 29.1            | -0.8                         | <b>0.5</b>                 |
| MD98-2162                          | 28.5          | 28.4              | 28.1            | <b>-0.1</b>                  | -0.4                       |
| MD98-2165                          | 27.9          | 27.6              | 26.8            | <b>-0.2</b>                  | -1.1                       |
| MD98-2176                          | 27.8          | 28.9              | 30.2            | <b>1.0</b>                   | 2.4                        |
| MD98-2178                          | 28.5          | 27.5              | 28.7            | -1.0                         | <b>0.2</b>                 |
| MD98-2181                          | 28.3          | 29.2              | 30.7            | <b>0.9</b>                   | 2.4                        |
| MD98-2188                          | 28.0          | 28.7              | 29.8            | <b>0.6</b>                   | 1.7                        |
| P178-15P                           | 28.1          | 27.7              | 28.0            | -0.3                         | <b>0.0</b>                 |
| SK17                               | 27.7          | 26.5              | 27.8            | -1.3                         | <b>0.1</b>                 |
| SK218-1                            | 28.1          | 29.0              | 29.9            | <b>0.9</b>                   | 1.9                        |
| SK237-GC04                         | 27.9          | 28.4              | 28.9            | <b>0.5</b>                   | 1.0                        |
| SO18480                            | 28.3          | 28.2              | 28.0            | <b>-0.1</b>                  | -0.3                       |
| SO189-119KL                        | 28.8          | 29.6              | 30.6            | <b>0.9</b>                   | 1.8                        |
| SO189-39KL                         | 28.6          | 29.7              | 30.2            | <b>1.1</b>                   | 1.7                        |
| TR163-22                           | 24.0          | 24.4              | 18.5            | <b>0.3</b>                   | -5.5                       |
| U1446                              | 27.7          | 28.5              | 29.8            | <b>0.8</b>                   | 2.1                        |
| <b>Average absolute deviation:</b> |               |                   |                 | <b>0.9</b>                   | <b>1.4</b>                 |

**Table S3.** Same as Table S2, but for  $U_{37}^{K'}$ – SSTs applying (i) the original calibrations and (ii) the BAYSPLINE calibration.

| Site                               | COBE SST (°C) | Original SST (°C) | BAYSPLINE SST (°C) | Original SST – COBE SST (°C) | BAYSPLINE SST – COBE SST (°C) |
|------------------------------------|---------------|-------------------|--------------------|------------------------------|-------------------------------|
| 167-1019C                          | 11.0          | 11.4              | 11.0               | 0.5                          | <b>0.0</b>                    |
| GeoB10038-4                        | 28.3          | 27.7              | 28.9               | -0.6                         | <b>0.6</b>                    |
| GeoB5844-2                         | 24.7          | 26.7              | 28.0               | <b>2.0</b>                   | 3.3                           |
| GeoB7186-3                         |               | 13.6              | 13.1               |                              |                               |
| GIK17286-1                         | 27.6          | 28.5              | 29.2               | <b>0.9</b>                   | 1.6                           |
| GIK17940-2                         | 25.9          | 26.8              | 27.2               | <b>0.9</b>                   | 1.3                           |
| GIK17954-2                         | 27.1          | 27.0              | 27.4               | <b>-0.2</b>                  | 0.3                           |
| KNR195-5-CDH23                     | 21.8          | 23.3              | 22.7               | 1.6                          | <b>0.9</b>                    |
| KT05-7-PC-02                       | 12.1          | 23.1              | 22.4               | 11.0                         | <b>10.3</b>                   |
| LPAZ21P                            | 24.3          | 25.1              | 25.6               | <b>0.8</b>                   | 1.3                           |
| M75-3-137-3                        | 26.3          | 27.6              | 28.3               | <b>1.3</b>                   | 2.0                           |
| M77-2-059-1                        | 21.8          | 21.9              | 21.1               | <b>0.1</b>                   | -0.7                          |
| MD01-2412                          | 6.0           | 12.4              | 11.9               | 6.4                          | <b>5.9</b>                    |
| MD02-2529                          | 27.9          | 28.9              | 28.5               | 1.0                          | <b>0.6</b>                    |
| MD03-2607                          | 16.1          | 18.3              | 17.6               | 2.2                          | <b>1.5</b>                    |
| MD03-2611G                         | 16.0          | 18.7              | 17.9               | 2.7                          | <b>1.9</b>                    |
| MD06-3075                          | 28.3          | 28.4              | 29.1               | <b>0.1</b>                   | 0.8                           |
| MD77-194                           | 27.9          | 27.5              | 29.3               | <b>-0.4</b>                  | 1.4                           |
| MD79-257                           | 26.0          | 26.9              | 27.9               | <b>0.9</b>                   | 1.9                           |
| MD97-2151                          | 27.7          | 27.4              | 27.8               | -0.3                         | <b>0.2</b>                    |
| P178-15P                           | 28.1          | 28.4              | 29.2               | <b>0.4</b>                   | 1.2                           |
| SO42-74KL                          | 26.2          | 27.2              | 28.9               | <b>1.0</b>                   | 2.7                           |
| U1429                              | 21.9          | 23.8              | 23.9               | 1.9                          | <b>1.9</b>                    |
| V19-27                             | 24.3          | 26.2              | 27.3               | <b>1.8</b>                   | 3.0                           |
| 167-1019C                          | 11.0          | 11.4              | 11.0               |                              |                               |
| <b>Average absolute deviation:</b> |               |                   |                    | <b>1.6</b>                   | <b>1.9</b>                    |

**Table S4.** Summary of calculated mean SST anomalies (°C) for the South China Sea (SCS), Western Pacific Warm Pool (WPWP) and eastern equatorial Pacific (EEP) areas

|               | SCS (108°E, 21°N - 120°E, 5°N) |                             |                          | WPWP (138°E, 10°N - 160°E, 10°S) |                             |                          | EEP (93°W, 10°N - 80°W, 5°S) |                             |                          |
|---------------|--------------------------------|-----------------------------|--------------------------|----------------------------------|-----------------------------|--------------------------|------------------------------|-----------------------------|--------------------------|
|               | Proxy-based                    | without expanded vegetation | with expanded vegetation | Proxy-based                      | without expanded vegetation | with expanded vegetation | Proxy-based                  | without expanded vegetation | with expanded vegetation |
| <b>6 ka</b>   | 0.1                            | -0.5                        | 0.0                      | 0.1                              | -0.3                        | 0.1                      | -0.1                         | -0.4                        | -0.2                     |
| <b>127 ka</b> | 0.4                            | -0.8                        | -0.3                     | 0.8                              | -0.3                        | 0.4                      | 1.9                          | -0.2                        | 0.2                      |
| <b>409 ka</b> | 0.3                            | -0.5                        | 0.0                      | 0.5                              | 0.0                         | 0.5                      | 2.0                          | -0.2                        | 0.1                      |

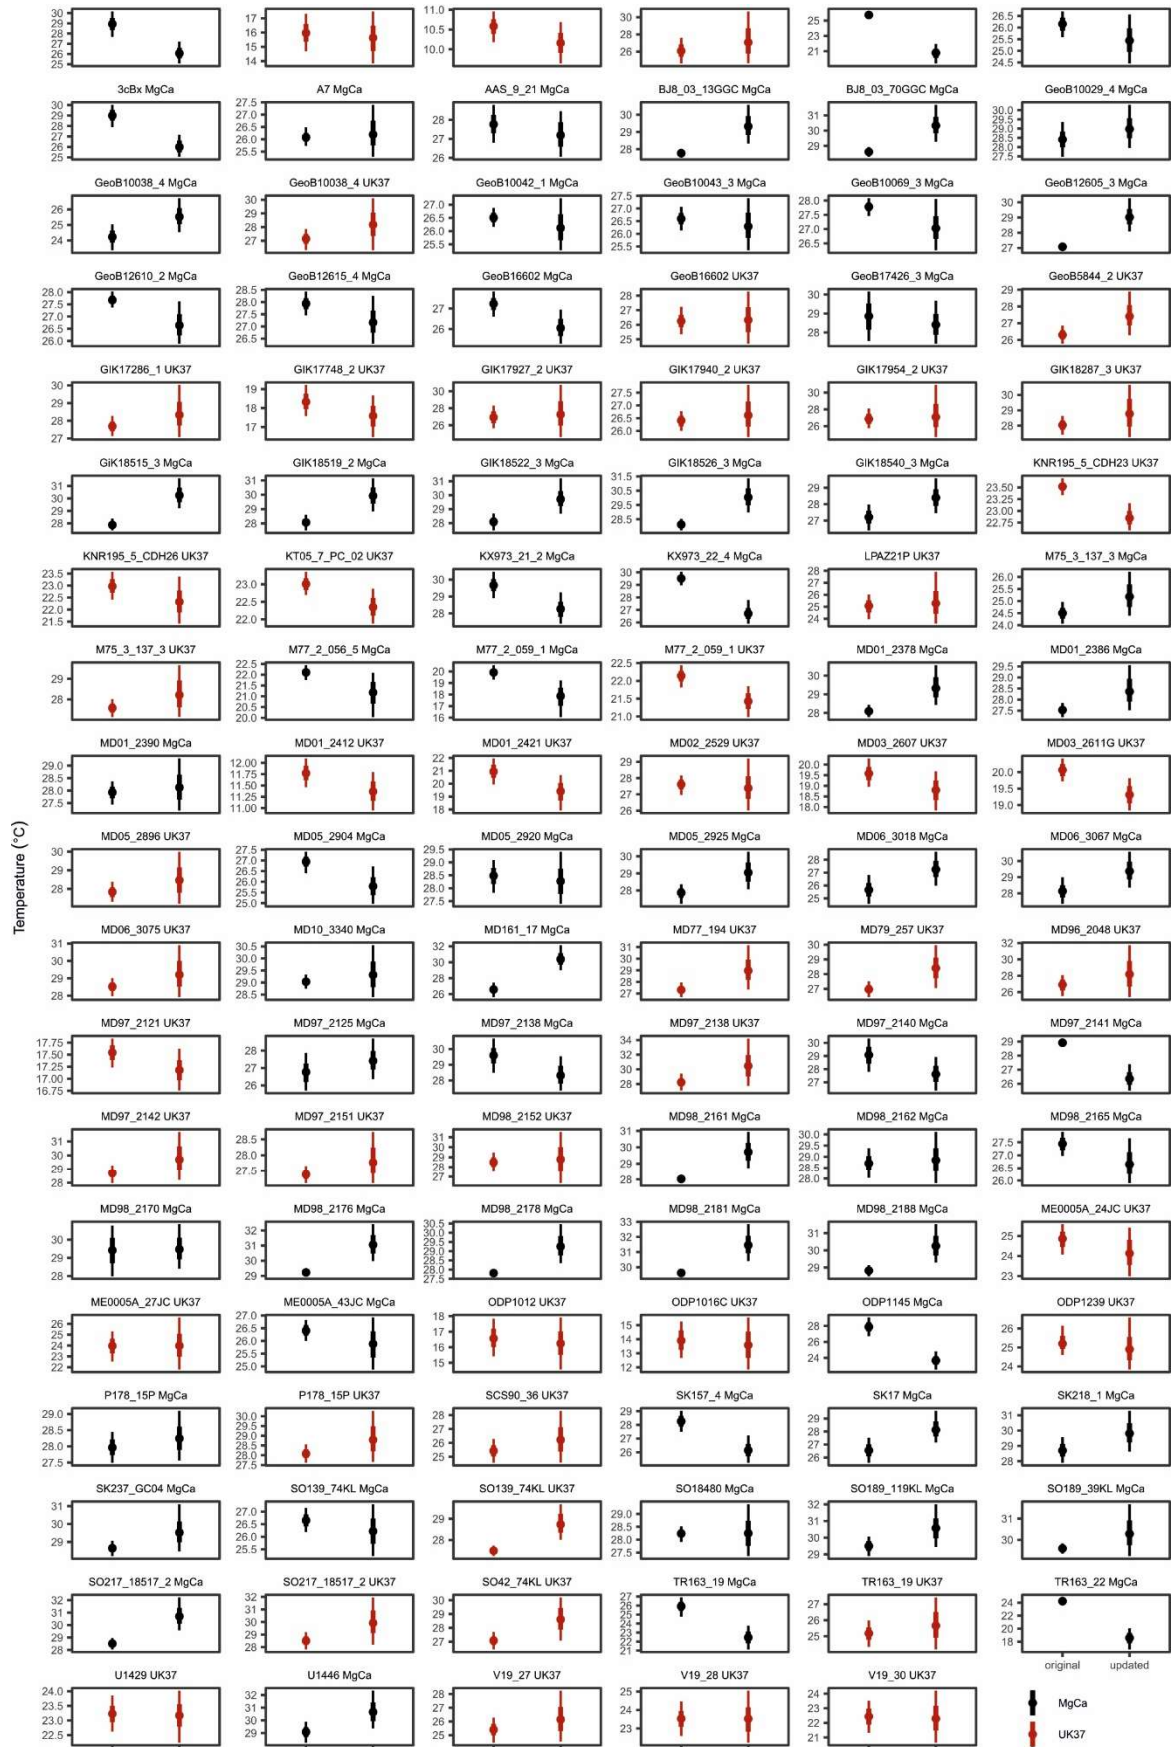

**Fig. S1.** Comparison of SSTs resulting from the application of the original and homogenized proxy-SST calibrations. Mean mid-Holocene SSTs of all records resulting from the application of original and homogenized (updated) proxy-SST calibrations. Black and red dots indicate SST estimates based on Mg/Ca and UK'37. Whiskers show the 16.6<sup>th</sup> and 83.3<sup>rd</sup> (thick line) 2.5<sup>th</sup> and 97.5<sup>th</sup> (thin line) percentiles.

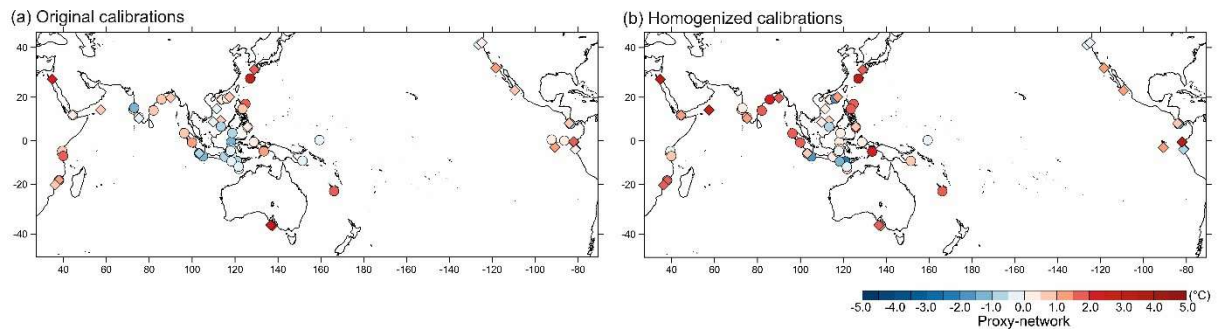

**Fig. S2.** Difference between Mg/Ca- (dots) and  $U_{37}^{K'}$ - (diamonds) based SST during the Common Era (CE) and the COBEv2 1850-1900 SST data. Colors indicate SSTs colder (blue) and warmer (red) than indicated by COBE.

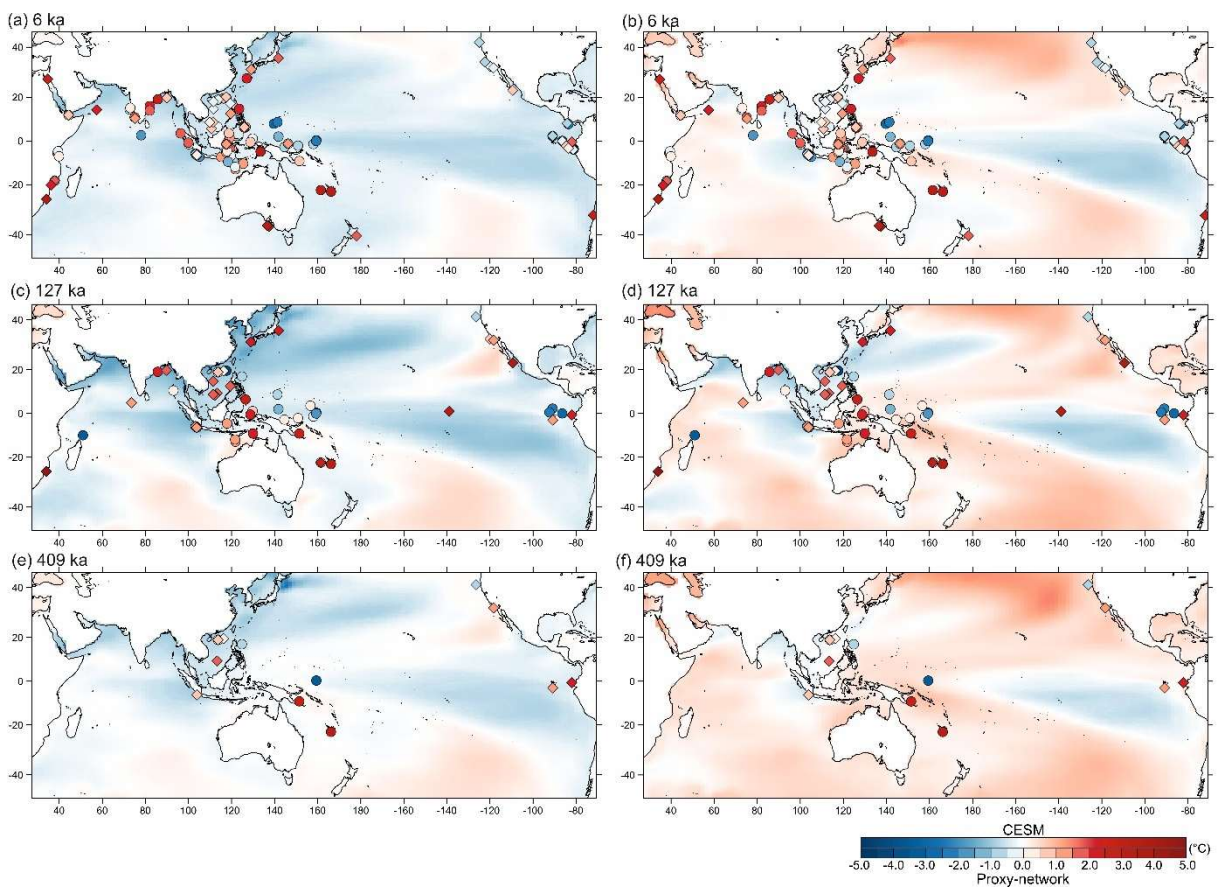

**Fig. S3.** Same as Fig. 2, but for homogenized SSTs. SST anomalies during (a, b) mid-Holocene, (c, d) MIS 5e, and (e, f) MIS 11c relative to the preindustrial period from Community Earth System Model (CESM) 1.2.2. time slice simulations without (a, c, e) and with (b, d, f) expanded NH vegetation. Symbols represent Mg/Ca- (dots) and  $U_{37}^{K'}$ - (diamonds) based SST anomalies relative to COBEv2 1850-1900 SST. Colors indicate SSTs colder (blue) and warmer (red) than the reference period.

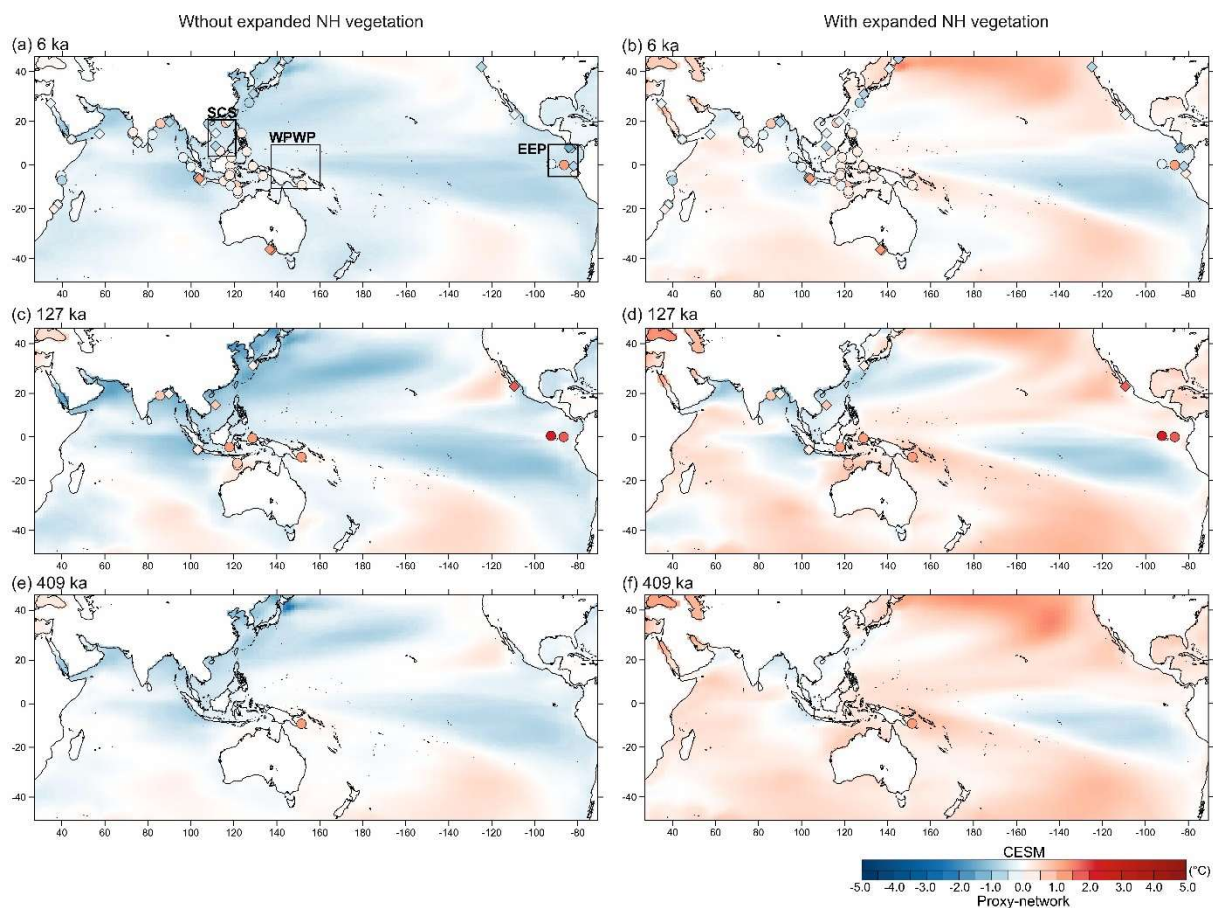

**Fig. S4.** Same as Fig. 2, but using reconstructed CE SSTs as preindustrial reference. SST anomalies during (a, b) mid-Holocene, (c, d) MIS 5e, and (e, f) MIS 11c relative to the preindustrial period from Community Earth System Model (CESM) 1.2.2. time slice simulations without (a, c, e) and with (b, d, f) expanded NH vegetation. Symbols represent Mg/Ca- (dots) and  $U_{37}^{K'}$ -(diamonds) based SST anomalies relative to Common Era (CE) SST. Colors indicate SSTs colder (blue) and warmer (red) than the reference period.

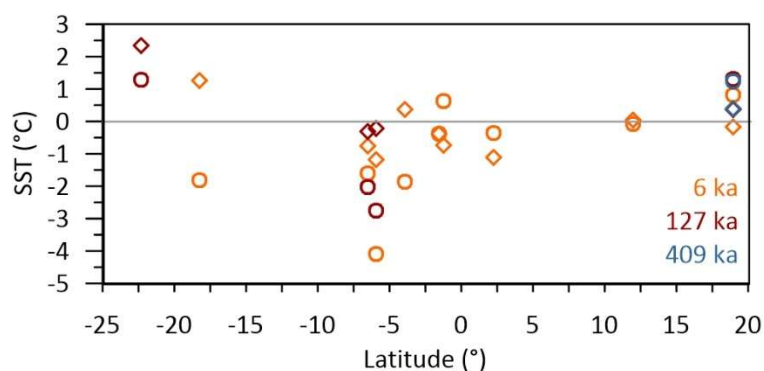

**Fig. S5.** Comparison of Mg/Ca- (dots) and  $U_{37}^{K'}$ -(diamonds) based SST anomalies from sites, where both proxy reconstructions are available for the 6-ka (orange), 127-ka (red) and 409-ka (blue) time slices.

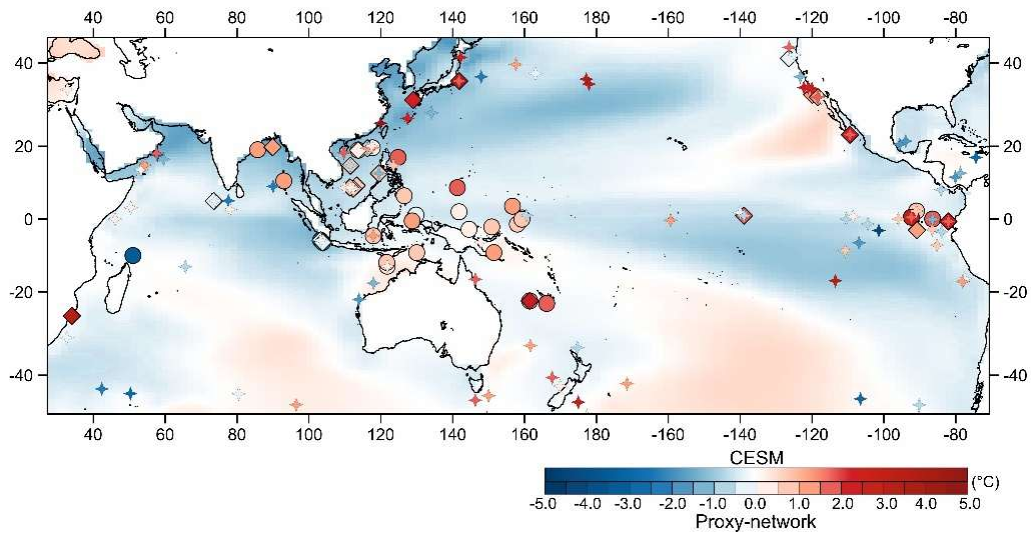

**Fig. S6.** Comparison of SST anomalies resulting from Mg/Ca and U<sub>37</sub><sup>K'</sup> (large dots and diamonds; this study) and SST anomalies resulting from Mg/Ca, U<sub>37</sub><sup>K'</sup> and microfossil assemblages (star-diamonds; Turney et al., 2020) during MIS 5e. The background map shows the SST anomalies in CESM (see main text).

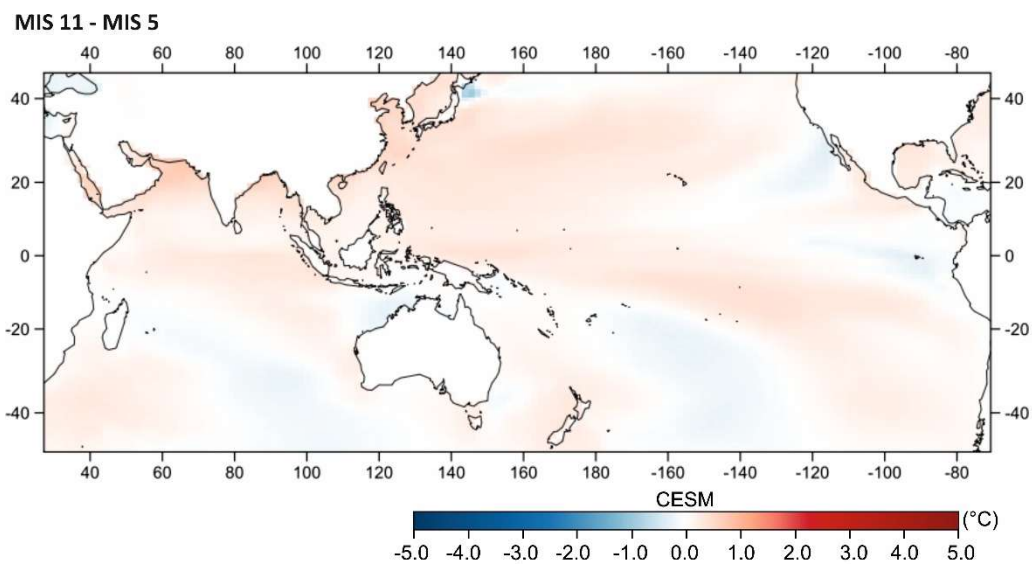

**Fig. S7.** Mean annual SST anomalies during MIS 11c relative to MIS 5e as derived from CESM time slice simulations. Colors indicate SSTs colder (blue) and warmer (red) than the reference period.

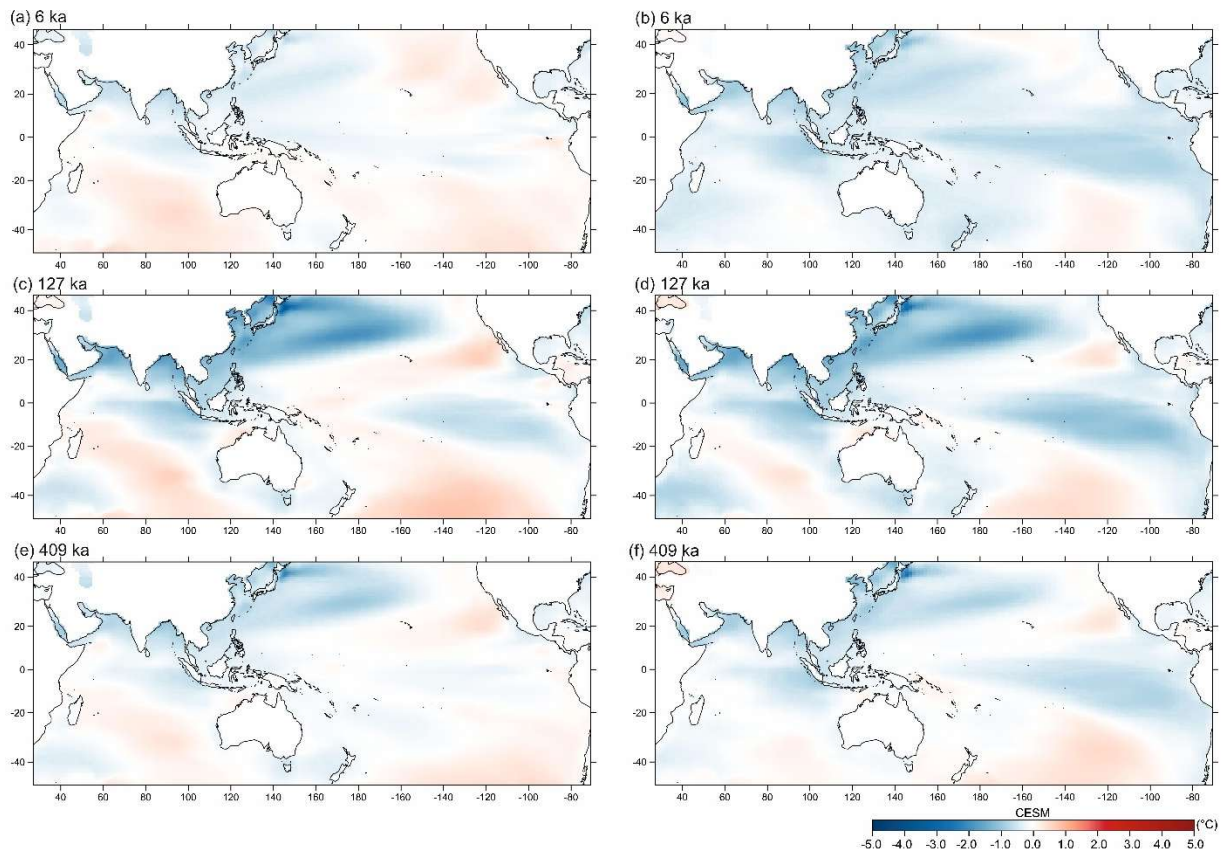

**Fig. S8.** Mean annual SST anomalies during (a, b) mid-Holocene, (c, d) MIS 5e, and (e, f) MIS 11c relative to the preindustrial period from CESM time slice simulations with fixed (a, c, e) and dynamic (b, d, f) greenhouse gases. Colors indicate SSTs colder (blue) and warmer (red) than the reference period.

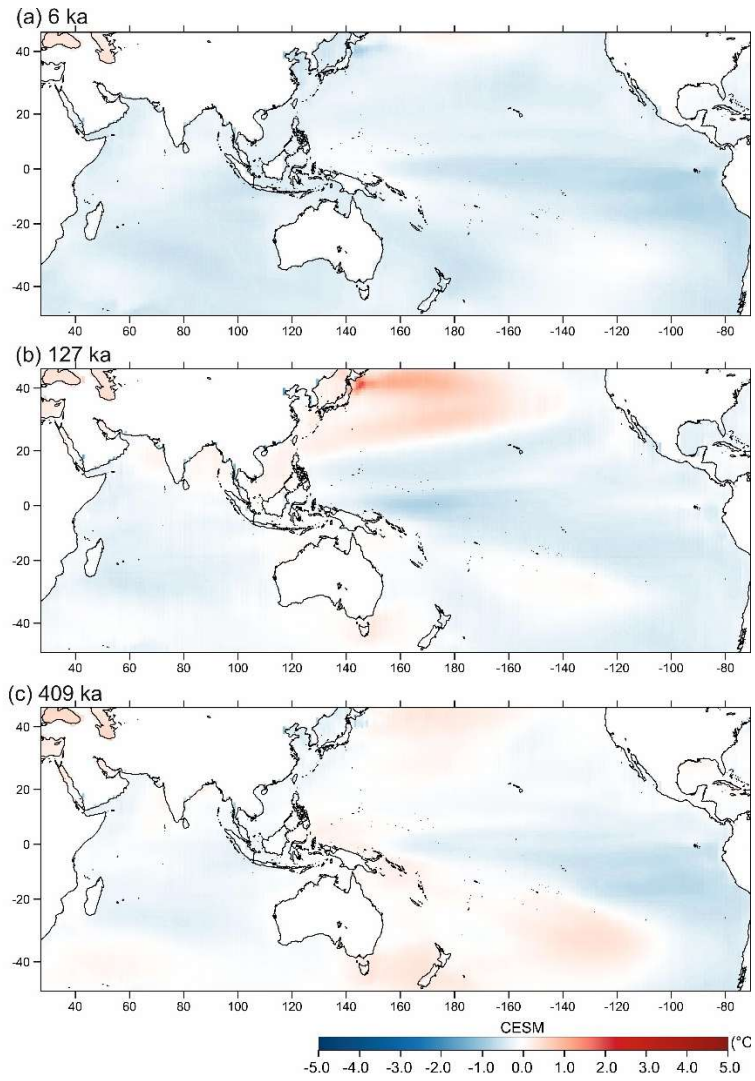

**Fig. S9.** Difference between mean annual SST anomalies with fixed and with dynamic greenhouse gas concentrations (calculated as SST anomalies with dynamic GHGs – SST anomalies with fixed GHGs) in CESM at (a) 6 ka, (b) 127 ka and (c) 409 ka.

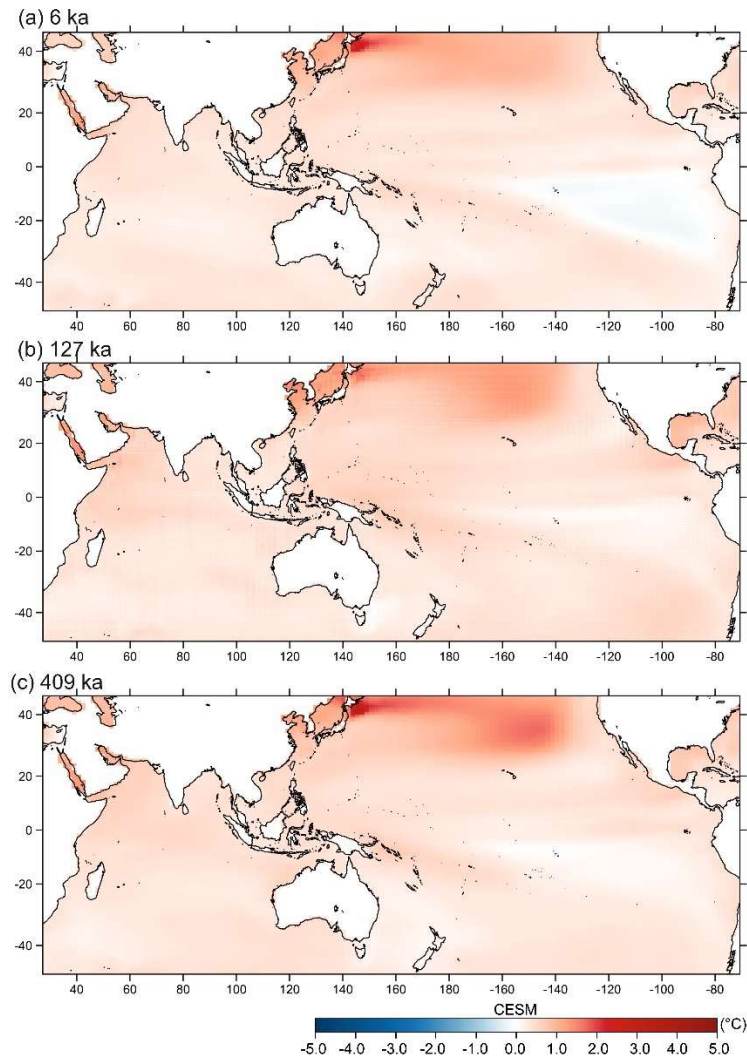

**Fig. S10.** Effect of vegetation expansion at (a) 6 ka, (b) 127 ka and (c) 409 ka. The vegetation effect was assessed by calculating the difference between mean annual SST anomalies derived from CESM runs with vegetation expansion and mean SST anomalies derived from CESM without vegetation expansion.

## References

- Anand, P., Kroon, D., Singh, A. D., Ganeshram, R. S., Ganssen, G., & Elderfield, H. (2008). Coupled sea surface temperature-seawater  $\delta^{18}\text{O}$  reconstructions in the Arabian Sea at the millennial scale for the last 35 ka. *Paleoceanography*, *23*(4). <https://doi.org/10.1029/2007pa001564>
- Arz, H. W., Pätzold, J., Müller, P. J., & Moammar, M. O. (2003). Influence of Northern Hemisphere climate and global sea level rise on the restricted Red Sea marine environment during termination I. *Paleoceanography*, *18*(2). <https://doi.org/10.1029/2002PA000864>
- Barron, J. A., Heusser, L., Herbert, T., & Lyle, M. (2003). High-resolution climatic evolution of coastal northern California during the past 16,000 years. *Paleoceanography*, *18*(1). <https://doi.org/10.1029/2002pa000768>
- Benway, H. M., Mix, A. C., Haley, B. A., & Klinkhammer, G. P. (2006). Eastern Pacific Warm Pool paleosalinity and climate variability: 0–30 kyr. *Paleoceanography*, *21*(3). <https://doi.org/10.1029/2005pa001208>
- Bolliet, T., Holbourn, A., Kuhnt, W., Laj, C., Kissel, C., Beaufort, L., . . . Garbe-Schonberg, D. (2011). Mindanao Dome variability over the last 160 kyr: Episodic glacial cooling of the West Pacific Warm Pool. *Paleoceanography*, *26*(1). <https://doi.org/10.1029/2010pa001966>
- Bova, S. C., Herbert, T., Rosenthal, Y., Kalansky, J., Altabet, M., Chazen, C., . . . Zech, J. (2015). Links between eastern equatorial Pacific stratification and atmospheric  $\text{CO}_2$  rise during the last deglaciation. *Paleoceanography*, *30*(11), 1407–1424. <https://doi.org/10.1002/2015pa002816>
- Butzin, M., Köhler, P., & Lohmann, G. (2017). Marine Radiocarbon Reservoir Age Simulations for the Past 50,000 Years. *Geophysical Research Letters*. <https://doi.org/10.1002/2017gl074688>

- Caley, T., Kim, J. H., Malaize, B., Giraudeau, J., Laepple, T., Caillon, N., . . . Damsté, J. S. (2011). High-latitude obliquity as a dominant forcing in the Agulhas current system *Climate of the Past*, 7(4), 1285–1296. <https://doi.org/10.5194/cp-7-1285-2011>
- Cappelli, E. L. G., Holbourn, A., Kuhnt, W., & Regenberg, M. (2016). Changes in Timor Strait hydrology and thermocline structure during the past 130ka. *Palaeogeography Palaeoclimatology Palaeoecology*, 462, 112–124. <https://doi.org/10.1016/j.palaeo.2016.09.010>
- Cheng, Z., Weng, C., Steinke, S., & Mohtadi, M. (2018). Anthropogenic modification of vegetated landscapes in southern China from 6,000 years ago. *Nature Geoscience*. <https://doi.org/10.1038/s41561-018-0250-1>
- Clemens, S. C., Holbourn, A., Kubota, Y., Lee, K. E., Liu, Z., Chen, G., . . . Fox-Kemper, B. (2018). Precession-band variance missing from East Asian monsoon runoff. *Nat Commun*, 9(1), 3364. <https://doi.org/10.1038/s41467-018-05814-0>
- Clemens, S. C., Yamamoto, M., Thirumalai, K., Giosan, L., Richey, J. N., Nilsson-Kerr, K., . . . McGrath, S. M. (2021). Remote and local drivers of Pleistocene South Asian summer monsoon precipitation: A test for future predictions. *Science Advances*, 7(23), eabg3848. <https://doi.org/doi:10.1126/sciadv.abg3848>
- Dang, H., Jian, Z., Bassinot, F., Qiao, P., & Cheng, X. (2012). Decoupled Holocene variability in surface and thermocline water temperatures of the Indo-Pacific Warm Pool. *Geophysical Research Letters*, 39(1). <https://doi.org/10.1029/2011gl050154>
- Dang, H., Jian, Z., Wang, Y., Mohtadi, M., Rosenthal, Y., Ye, L., . . . Kuhnt, W. (2020). Pacific warm pool subsurface heat sequestration modulated Walker circulation and ENSO activity during the Holocene. *Science Advances*, 6(42). <https://doi.org/10.1126/sciadv.abc0402>
- De Deckker, P., Moros, M., Perner, K., Blanz, T., Wacker, L., Schneider, R., . . . Jansen, E. (2020). Climatic evolution in the Australian region over the last 94 ka - spanning human occupancy -, and unveiling the Last Glacial Maximum. *Quaternary Science Reviews*, 249. <https://doi.org/10.1016/j.quascirev.2020.106593>
- de Garidel-Thoron, T., Beaufort, L., Linsley, B. K., & Dannenmann, S. (2001). Millennial-scale dynamics of the east Asian winter monsoon during the last 200,000 years. *Paleoceanography*, 16(5), 491–502. <https://doi.org/10.1029/2000PA000557>
- de Garidel-Thoron, T., Rosenthal, Y., Bassinot, F., & Beaufort, L. (2005). Stable sea surface temperatures in the western Pacific warm pool over the past 1.75 million years. *Nature*, 433(7023), 294–298. <https://doi.org/10.1038/nature03189>
- de Garidel-Thoron, T., Rosenthal, Y., Beaufort, L., Bard, E., Sonzogni, C., & Mix, A. C. (2007). A multiproxy assessment of the western equatorial Pacific hydrography during the last 30 kyr. *Paleoceanography*, 22. <https://doi.org/10.1029/2006PA001269>
- Dong, L., Li, L., Li, Q., Wang, H., & Zhang, C. L. (2015). Hydroclimate Implications of Thermocline Variability in the Southern South China Sea Over the Past 180,000 yr. *Quaternary Research*, 83(02), 370–377. <https://doi.org/10.1016/j.yqres.2014.12.003>
- Dubois, N., & Kienast, M. (2011). Spatial reorganization in the equatorial divergence in the Eastern Tropical Pacific during the last 150 kyr. *Geophysical Research Letters*, 38(16). <https://doi.org/10.1029/2011gl048325>
- Dubois, N., Kienast, M., Kienast, S., Normandeau, C., Calvert, S. E., Herbert, T. D., & Mix, A. (2011). Millennial-scale variations in hydrography and biogeochemistry in the Eastern Equatorial Pacific over the last 100 kyr. *Quaternary Science Reviews*, 30(1–2), 210–223. <https://doi.org/10.1016/j.quascirev.2010.10.012>
- Dubois, N., Kienast, M., Normandeau, C., & Herbert, T. D. (2009). Eastern equatorial Pacific cold tongue during the Last Glacial Maximum as seen from alkenone paleothermometry. *Paleoceanography*, 24(4). <https://doi.org/10.1029/2009pa001781>
- Dyez, K. A., Ravelo, A. C., & Mix, A. C. (2016). Evaluating drivers of Pleistocene eastern tropical Pacific sea surface temperature. *Paleoceanography*, 31(8), 1054–1069. <https://doi.org/10.1002/2015PA002873>
- Etourneau, J., Schneider, R., Blanz, T., & Martinez, P. (2010). Intensification of the Walker and Hadley atmospheric circulations during the Pliocene–Pleistocene climate transition. *Earth and Planetary Science Letters*, 297(1), 103–110. <https://doi.org/10.1016/j.epsl.2010.06.010>
- Fan, W., Jian, Z., Chu, Z., Dang, H., Wang, Y., Bassinot, F., . . . Bian, Y. (2018). Variability of the Indonesian Throughflow in the Makassar Strait over the Last 30 ka. *Sci Rep*, 8(1), 5678. <https://doi.org/10.1038/s41598-018-24055-1>
- Fan, W., Jian, Z. M., Bassinot, F., & Chu, Z. H. (2013). Holocene centennial-scale changes of the Indonesian and South China Sea throughflows: Evidences from the Makassar Strait. *Global and Planetary Change*, 111, 111–117. <https://doi.org/10.1016/j.gloplacha.2013.08.017>
- Fraser, N., Kuhnt, W., Holbourn, A., Bolliet, T., Andersen, N., Blanz, T., & Beaufort, L. (2014). Precipitation variability within the West Pacific Warm Pool over the past 120 ka: Evidence from the Davao Gulf, southern Philippines. *Paleoceanography*, 29(11), 1094–1110. <https://doi.org/10.1002/2013pa002599>
- Gibbons, F. T., Oppo, D. W., Mohtadi, M., Rosenthal, Y., Cheng, J., Liu, Z., & Linsley, B. K. (2014). Deglacial  $\delta^{18}\text{O}$  and hydrologic variability in the tropical Pacific and Indian Oceans. *Earth and Planetary Science Letters*, 387, 240–251. <https://doi.org/10.1016/j.epsl.2013.11.032>

- Govil, P., & Naidu, D. P. (2011). Variations of Indian monsoon precipitation during the last 32kyr reflected in the surface hydrography of the Western Bay of Bengal. *Quaternary Science Reviews*, 30(27), 3871–3879. <https://doi.org/10.1016/j.quascirev.2011.10.004>
- Govil, P., & Naidu, P. D. (2010). Evaporation-precipitation changes in the eastern Arabian Sea for the last 68 ka: Implications on monsoon variability. *Paleoceanography*, 25(1). <https://doi.org/10.1029/2008pa001687>
- Gray, W. R., Weldeab, S., Lea, D. W., Rosenthal, Y., Gruber, N., Donner, B., & Fischer, G. (2018). The effects of temperature, salinity, and the carbonate system on Mg/Ca in *Globigerinoides ruber* (white): A global sediment trap calibration. *Earth and Planetary Science Letters*, 482, 607–620. <https://doi.org/10.1016/j.epsl.2017.11.026>
- Harada, N., Ahagon, N., Sakamoto, T., Uchida, M., Ikehara, M., & Shibata, Y. (2006). Rapid fluctuation of alkenone temperature in the southwestern Okhotsk Sea during the past 120 ky. *Global and Planetary Change*, 5329–46. <https://doi.org/10.1016/j.gloplacha.2006.01.010>
- Hendrizen, M., Kuhnt, W., & Holbourn, A. (2017). Variability of Indonesian Throughflow and Borneo Runoff During the Last 14 kyr. *Paleoceanography*, 32(10), 1054–1069. <https://doi.org/10.1002/2016pa003030>
- Herbert, T. D., Cleaveland Peterson, L., Lawrence, K. T., & Liu, Z. (2010). Tropical Ocean Temperatures Over the Past 3.5 Million Years. *Science*, 328, 1530–1534. <https://doi.org/10.1126/science.1185435>
- Herbert, T. D., Schuffert, J. D., Andreasen, D., Heusser, L., Lyle, M., Mix, A., . . . Herguera, J. C. (2001). Collapse of the California Current during glacial maxima linked to climate change on land. *Science*, 293(5527), 71–76. <https://doi.org/10.1126/science.1059209>
- Herbert, T. D., Schuffert, J. D., Thomas, D., Lange, C., Weinheimer, A., Peleo-Alampay, A., & Herguera, J.-C. (1998). Depth and seasonality of alkenone production along the California Margin inferred from a core top transect. *Paleoceanography*, 13(3), 263–271. <https://doi.org/10.1029/98PA00069>
- Heusser, L., Lyle, M., & Mix, A. (2000). Vegetation and climate of the northwest coast of North America during the last 500 K.Y.: High-resolution pollen evidence from the northern California margin. *Proceedings of the Ocean Drilling Program: Scientific results*, 167. <https://doi.org/10.2973/odp.proc.sr.167.206.2000>
- Holbourn, A., Kuhnt, W., Kawamura, H., Jian, Z., Grootes, P., Erlenkeuser, H., & Xu, J. (2005). Orbitally paced paleoproductivity variations in the Timor Sea and Indonesian Throughflow variability during the last 460 kyr. *Paleoceanography*, 20(3), <https://doi.org/10.1029/2004pa001094>
- Hollstein, M., Mohtadi, M., Kienast, M., Rosenthal, Y., Groeneveld, J., Oppo, D. W., . . . Lückge, A. (2020). The Impact of Astronomical Forcing on Surface and Thermocline Variability Within the Western Pacific Warm Pool Over the Past 160 kyr. *Paleoceanography and Paleoclimatology*, 35(6). <https://doi.org/10.1029/2019pa003832>
- Huang, C.-Y., Wu, S.-F., Zhao, M., Chen, M.-T., Wang, C.-H., Tu, X., & Yuan, P. B. (1997). Surface ocean and monsoon climate variability in the South China Sea since the last glaciation. *Marine Micropaleontology*, 32(1), 71–94. [https://doi.org/10.1016/S0377-8398\(97\)00014-5](https://doi.org/10.1016/S0377-8398(97)00014-5)
- Huang, E., Chen, Y. C., Schefuß, E., Steinke, S., Liu, J., Tian, J., . . . Mohtadi, M. (2018). Precession and glacial-cycle controls of monsoon precipitation isotope changes over East Asia during the Pleistocene. *Earth and Planetary Science Letters*, 494, 1–11. <https://doi.org/10.1016/j.epsl.2018.04.046>
- Jasper, J. P., Hayes, J. M., Mix, A. C., & Prahl, F. G. (1994). Photosynthetic fractionation of  $^{13}\text{C}$  and concentrations of dissolved  $\text{CO}_2$  in the central equatorial Pacific during the last 255,000 years. *Paleoceanography*, 9(6), 781–798. <https://doi.org/10.1029/94PA02116>
- Jia, Q., Li, T., Xiong, Z., Steinke, S., Jiang, F., Chang, F., & Qin, B. (2018). Hydrological variability in the western tropical Pacific over the past 700 kyr and its linkage to Northern Hemisphere climatic change. *Palaeogeography, Palaeoclimatology, Palaeoecology*. <https://doi.org/10.1016/j.palaeo.2017.12.039>
- Jian, Z., Wang, Y., Dang, H., Lea, D. W., Liu, Z., Jin, H., & Yin, Y. (2020). Half-precessional cycle of thermocline temperature in the western equatorial Pacific and its bihemispheric dynamics. *Proc Natl Acad Sci U S A*, 117(13), 7044–7051. <https://doi.org/10.1073/pnas.1915510117>
- Jian, Z., Wang, Y., Dang, H., Mohtadi, M., Rosenthal, Y., Lea, D. W., . . . Wang, X. (2022). Warm pool ocean heat content regulates ocean–continent moisture transport. *Nature*, 612, 92–99. <https://doi.org/10.1038/s41586-022-05302-y>
- Johnstone, H. J. H., Kiefer, T., Elderfield, H., & Schulz, M. (2014). Calcite saturation, foraminiferal test mass, and Mg/Ca-based temperatures dissolution corrected using XDX—A 150 ka record from the western Indian Ocean. *Geochemistry, Geophysics, Geosystems*, 15(3), 781–797. <https://doi.org/10.1002/2013GC004994>
- Jonkers, L., Hollstein, M., Siccha, M., & Kucera, M. (accepted). The PALMOD 130k marine palaeoclimate data synthesis version 2. *Earth System Science Data*.
- Kawahata, H., Yamamoto, H., Ohkushi, K. i., Yokoyama, Y., Kimoto, K., Ohshima, H., & Matsuzaki, H. (2009). Changes of environments and human activity at the Sannai-Maruyama ruins in Japan during the mid-Holocene Hypsithermal climatic interval. *Quaternary Science Reviews*, 28(9), 964–974. <https://doi.org/10.1016/j.quascirev.2008.12.009>
- Kiefer, T., McCave, I. N., & Elderfield, H. (2006). Antarctic control on tropical Indian Ocean sea surface temperature and hydrography. *Geophysical Research Letters*, 33(24). <https://doi.org/10.1029/2006gl027097>

- Kienast, M., Kienast, S. S., Calvert, S. E., Eglinton, T. I., Mollenhauer, G., Francois, R., & Mix, A. C. (2006). Eastern Pacific cooling and Atlantic overturning circulation during the last deglaciation. *Nature*, *443*(7113), 846–849. <https://doi.org/10.1038/nature05222>
- Kim, J.-H., Rimbu, N., Lorenz, S. J., Lohmann, G., Nam, S.-I., Schouten, S., . . . Schneider, R. R. (2004). North Pacific and North Atlantic sea-surface temperature variability during the Holocene. *Quaternary Science Reviews*, *23*(20-22), 2141–2154. <https://doi.org/10.1016/j.quascirev.2004.08.010>
- Kim, J.-H., Schneider, R. R., Hebbeln, D., Müller, P. J., & Wefer, G. (2002). Last deglacial sea-surface temperature evolution in the Southeast Pacific compared to climate changes on the South American continent. *Quaternary Science Reviews*, *21*(18), 2085–2097. [https://doi.org/10.1016/S0277-3791\(02\)00012-4](https://doi.org/10.1016/S0277-3791(02)00012-4)
- Koutavas, A., & Sachs, J. P. (2008). Northern timing of deglaciation in the eastern equatorial Pacific from alkenone paleothermometry. *Paleoceanography*, *23*(4), <https://doi.org/10.1029/2008pa001593>
- Kuhnert, H., Kuhlmann, H., Mohtadi, M., Meggers, H., Baumann, K.-H., & Pätzold, J. (2014). Holocene tropical western Indian Ocean sea surface temperatures in covariation with climatic changes in the Indonesian region. *Paleoceanography*, *29*(5), 423–437. <https://doi.org/10.1002/2013pa002555>
- Lauterbach, S., Andersen, N., Wang, Y. V., Blanz, T., Larsen, T., & Schneider, R. R. (2020). An ~130 kyr Record of Surface Water Temperature and  $\delta^{18}\text{O}$  From the Northern Bay of Bengal: Investigating the Linkage Between Heinrich Events and Weak Monsoon Intervals in Asia. *Paleoceanography and Paleoclimatology*, *35*(2), e2019PA003646. <https://doi.org/10.1029/2019PA003646>
- Lawrence, K. T., Liu, Z., & Herbert, T. D. (2006). Evolution of the Eastern Tropical Pacific Through Plio-Pleistocene Glaciation. *Science*, *312*(5770), 79–83. doi:10.1126/science.1120395
- Lea, D. W., Pak, D. K., Belanger, C. L., Spero, H. J., Hall, M. A., & Shackleton, N. J. (2006). Paleoclimate history of Galápagos surface waters over the last 135,000yr. *Quaternary Science Reviews*, *25*(11-12), 1152–1167. <https://doi.org/10.1016/j.quascirev.2005.11.010>
- Lea, D. W., Pak, D. K., & Spero, H. J. (2000). Climate impact of late quaternary equatorial Pacific sea surface temperature variations. *Science*, *289*(5485), 1719–1724.
- Leduc, G., Vidal, L., Tachikawa, K., Rostek, F., Sonzogni, C., Beaufort, L., & Bard, E. (2007). Moisture transport across Central America as a positive feedback on abrupt climatic changes. *Nature*, *445*(7130), 908–911. <https://doi.org/10.1038/nature05578>
- Levi, C., Labeyrie, L., Bassinot, F., Guichard, F., Cortijo, E., Waelbroeck, C., . . . Elderfield, H. (2007). Low-latitude hydrological cycle and rapid climate changes during the last deglaciation. *Geochemistry, Geophysics, Geosystems*, *8*(5). <https://doi.org/10.1029/2006gc001514>
- Li, L., Li, Q., Tian, J., Wang, P., Wang, H., & Liu, Z. (2011). A 4-Ma record of thermal evolution in the tropical western Pacific and its implications on climate change. *Earth and Planetary Science Letters*, *309*(1-2), 10–20. <https://doi.org/10.1016/j.epsl.2011.04.016>
- Linsley, B. K., Rosenthal, Y., & Oppo, D. W. (2010). Holocene evolution of the Indonesian throughflow and the western Pacific warm pool. *Nature Geoscience*, *3*(8), 578–583. <https://doi.org/10.1038/Ngeo920>
- Lisiecki, L. E., & Stern, J. V. (2016). Regional and global benthic  $\delta^{18}\text{O}$  stacks for the last glacial cycle. *Paleoceanography*, *31*(10), 1368–1394. <https://doi.org/10.1002/2016pa003002>
- Lo, L., Chang, S. P., Wei, K. Y., Lee, S. Y., Ou, T. H., Chen, Y. C., . . . Shen, C. C. (2017). Nonlinear climatic sensitivity to greenhouse gases over past 4 glacial/interglacial cycles. *Sci Rep*, *7*(1), 4626. <https://doi.org/10.1038/s41598-017-04031-x>
- Lo, L., Shen, C.-C., Zeeden, C., Tsai, Y.-H., Yin, Q., Yang, C.-C., . . . Chen, Y.-C. (2022). Orbital control on the thermocline structure during the past 568 kyr in the Solomon Sea, southwest equatorial Pacific. *Quaternary Science Reviews*, *295*. <https://doi.org/10.1016/j.quascirev.2022.107756>
- Lo, L., Shen, C. C., Wei, K. Y., Burr, G. S., Mii, H. S., Chen, M. T., . . . Tsai, M. C. (2014). Millennial meridional dynamics of the Indo-Pacific Warm Pool during the last termination. *Climate of the Past*, *10*(6), 2253–2261. <https://doi.org/10.5194/cp-10-2253-2014>
- Lopes dos Santos, R. A., Spooner, M. I., Barrows, T. T., De Deckker, P., Damsté, J. S., & Schouten, S. (2013). Comparison of organic (UK'37, TEXH86, LDI) and faunal proxies (foraminiferal assemblages) for reconstruction of late Quaternary sea surface temperature variability from offshore southeastern Australia. *Paleoceanography*, *28*, 377–387. <https://doi.org/10.1002/palo.20035>
- Lückge, A., Mohtadi, M., Rühlemann, C., Scheeder, G., Vink, A., Reinhardt, L., & Wiedicke, M. (2009). Monsoon versus ocean circulation controls on paleoenvironmental condition off southern Sumatra during the past 300,000 years. *Paleoceanography*, *24*. <https://doi.org/10.1029/2008PA001627>
- Medina-Elizalde, M., & Lea, D. W. (2005). The Mid-Pleistocene Transition in the Tropical Pacific. *Science*, *310*, 1009–1012. doi:10.1126/science.111593
- Mohtadi, M., Lückge, A., Steinke, S., Groeneveld, J., Hebbeln, D., & Westphal, N. (2010). Late Pleistocene surface and thermocline conditions of the eastern tropical Indian Ocean. *Quaternary Science Reviews*, *29*(7-8), 887–896. <https://doi.org/10.1016/j.quascirev.2009.12.006>
- Mohtadi, M., Prange, M., Oppo, D. W., De Pol-Holz, R., Merkel, U., Zhang, X., . . . Lückge, A. (2014). North Atlantic forcing of tropical Indian Ocean climate. *Nature*, *509*(7498), 76–80. <https://doi.org/10.1038/nature13196>

- Mohtadi, M., Romero, O. E., Kaiser, J., & Hebbeln, D. (2007). Cooling of the southern high latitudes during the Medieval Period and its effect on ENSO. *Quaternary Science Reviews*, 26(7), 1055–1066. <https://doi.org/10.1016/j.quascirev.2006.12.008>
- Mohtadi, M., Steinke, S., Lückge, A., Groeneveld, J., & Hathorne, E. C. (2010). Glacial to Holocene surface hydrography of the tropical eastern Indian Ocean. *Earth and Planetary Science Letters*, 292(1-2), 89–97. <https://doi.org/10.1016/j.epsl.2010.01.024>
- Naidu, P. D., & Govil, P. (2010). New evidence on the sequence of deglacial warming in the tropical Indian Ocean. *Journal of Quaternary Science*, 25(7), 1138–1143. <https://doi.org/10.1002/jqs.1392>
- Newton, A., Thunell, R., & Stott, L. (2006). Climate and hydrographic variability in the Indo-Pacific Warm Pool during the last millennium. *Geophysical Research Letters*, 33(19). <https://doi.org/10.1029/2006GL027234>
- Nilsson-Kerr, K., Anand, P., Holden, P. B., Clemens, S. C., & Leng, M. J. (2021). Dipole patterns in tropical precipitation were pervasive across landmasses throughout Marine Isotope Stage 5. *Communications Earth & Environment*, 2(1), 64. <https://doi.org/10.1038/s43247-021-00133-7>
- Nilsson-Kerr, K., Anand, P., Sexton, P. F., Leng, M. J., & Naidu, P. D. (2022). Indian Summer Monsoon variability 140–70 thousand years ago based on multi-proxy records from the Bay of Bengal. *Quaternary Science Reviews*, 279. <https://doi.org/10.1016/j.quascirev.2022.107403>
- Nürnberg, D., Bösch, T., Doering, K., Mollier-Vogel, E., Raddatz, J., & Schneider, R. (2015). Sea surface and subsurface circulation dynamics off equatorial Peru during the last ~17 kyr. *Paleoceanography*, 30(7), 984–999. <https://doi.org/10.1002/2014PA002706>
- Oppo, D. W., Linsley, B. K., Rosenthal, Y., Dannenmann, S., & Beaufort, L. (2003). Orbital and suborbital climate variability in the Sulu Sea, western tropical Pacific. *Geochemistry, Geophysics, Geosystems*, 4(1), 1–20. <https://doi.org/10.1029/2001gc000260>
- Pahnke, K., & Sachs, J. P. (2006). Sea surface temperatures of southern midlatitudes 0–160 kyr B.P. *Paleoceanography*, 21(2). <https://doi.org/10.1029/2005pa001191>
- Panmei, C., Naidu, P. D., & Mohtadi, M. (2017). Bay of Bengal Exhibits Warming Trend During the Younger Dryas: Implications of AMOC. *Geochemistry Geophysics Geosystems*, 18(12), 4317–4325. <https://doi.org/10.1002/2017GC007075>
- Pelejero, C., Grimalt, J. O., Heilig, S., Kienast, M., & Wang, L. (1999). High-resolution UK37 temperature reconstructions in the South China Sea over the past 220 kyr. *Paleoceanography*, 14(2), 224–231. <https://doi.org/10.1029/1998pa900015>
- Pena, L. D., Cacho, I., Ferretti, P., & Hall, M. A. (2008). El Niño–Southern Oscillation-like variability during glacial terminations and interlatitudinal teleconnections. *Paleoceanography*, 23(3), n/a–n/a. <https://doi.org/10.1029/2008pa001620>
- Reimer, P. J., Austin, W. E. N., Bard, E., Bayliss, A., Blackwell, P. G., Bronk Ramsey, C., . . . Talamo, S. (2020). The IntCal20 Northern Hemisphere Radiocarbon Age Calibration Curve (0–55 cal kBP). *Radiocarbon*, 62(4), 725–757. <https://doi.org/10.1017/rdc.2020.41>
- Rincón-Martínez, D., Lamy, F., Contreras, S., Leduc, G., Bard, E., Saukel, C., . . . Tiedemann, R. (2010). More humid interglacials in Ecuador during the past 500 kyr linked to latitudinal shifts of the equatorial front and the Intertropical Convergence Zone in the eastern tropical Pacific. *Paleoceanography*, 25(2). <https://doi.org/10.1029/2009PA001868>
- Rippert, N., Baumann, K.-H., & Pätzold, J. (2015). Thermocline fluctuations in the western tropical Indian Ocean during the past 35 ka. *Journal of Quaternary Science*, 30(3), 201–210. <https://doi.org/10.1002/jqs.2767>
- Romahn, S., Mackensen, A., Groeneveld, J., & Pätzold, J. (2014). Deglacial intermediate water reorganization: new evidence from the Indian Ocean. *Climate of the Past*, 10(1), 293–303. 10.5194/cp-10-293-2014
- Rostek, F., Bard, E., Beaufort, L., Sonzogni, C., & Ganssen, G. (1997). Sea surface temperature and productivity records for the past 240 kyr in the Arabian Sea. *Deep Sea Research Part II: Topical Studies in Oceanography*, 44(6-7), 1461–1480. [https://doi.org/10.1016/S0967-0645\(97\)00008-8](https://doi.org/10.1016/S0967-0645(97)00008-8)
- Russon, T., Elliot, M., Sadekov, A., Cabioch, G., Corrège, T., & De Deckker, P. (2011). The mid-Pleistocene transition in the subtropical southwest Pacific. *Paleoceanography*, 26(1). 10.1029/2010pa002019
- Sadatzi, H., Sarnthein, M., & Andersen, N. (2016). Changes in monsoon-driven upwelling in the South China Sea over glacial Terminations I and II: a multi-proxy record. *International Journal of Earth Sciences*, 105(4), 1273–1285. <https://doi.org/10.1007/s00531-015-1227-6>
- Sagawa, T., Yokoyama, Y., Ikehara, M., & Kuwae, M. (2012). Shoaling of the western equatorial Pacific thermocline during the last glacial maximum inferred from multispecies temperature reconstruction of planktonic foraminifera. *Palaeogeography, Palaeoclimatology, Palaeoecology*, 346–347, 120–129. <https://doi.org/10.1016/j.palaeo.2012.06.002>
- Saikk, R., Stott, L., & Thunell, R. (2009). A bi-polar signal recorded in the western tropical Pacific: Northern and Southern Hemisphere climate records from the Pacific warm pool during the last Ice Age. *Quaternary Science Reviews*, 28(23-24), 2374–2385. <https://doi.org/10.1016/j.quascirev.2009.05.007>

- Saraswat, R., Lea, D. W., Nigam, R., Mackensen, A., & Naik, D. K. (2013). Deglaciation in the tropical Indian Ocean driven by interplay between the regional monsoon and global teleconnections. *Earth and Planetary Science Letters*, 375, 166–175. <https://doi.org/10.1016/j.epsl.2013.05.022>
- Saraswat, R., Nigam, R., Weldeab, S., Mackensen, A., & Naidu, P. D. (2005). A first look at past sea surface temperatures in the equatorial Indian Ocean from Mg/Ca in foraminifera. *Geophysical Research Letters*, 32(24). <https://doi.org/10.1029/2005gl024093>
- Schröder, J. F., Holbourn, A., Kuhnt, W., & Küssner, K. (2016). Variations in sea surface hydrology in the southern Makassar Strait over the past 26 kyr. *Quaternary Science Reviews*, 154, 143–156. <https://doi.org/10.1016/j.quascirev.2016.10.018>
- Schröder, J. F., Kuhnt, W., Holbourn, A., Beil, S., Zhang, P., Hendrizon, M., & Xu, J. (2018). Deglacial Warming and Hydroclimate Variability in the Central Indonesian Archipelago. *Paleoceanography and Paleoclimatology*. <https://doi.org/10.1029/2018pa003323>
- Setiawan, R. Y., Mohtadi, M., Southon, J., Groeneveld, J., Steinke, S., & Hebbeln, D. (2015). The consequences of opening the Sunda Strait on the hydrography of the eastern tropical Indian Ocean. *Paleoceanography*, 30(10), 1358–1372. <https://doi.org/10.1002/2015pa002802>
- Shiau, L. J., Yu, P. S., Wei, K. Y., Yamamoto, M., Lee, T. Q., Fang, T. H., & Chen, M. T. (2008). Sea surface temperature, productivity, and terrestrial flux variations of the southeastern South China Sea over the past 800,000 years (IMAGES MD972142). *Terrestrial, Atmospheric and Oceanic Sciences*, 19, 363–376. 10.3319/TAO.2008.19.4.363(IMAGES)
- Sonzogni, C., Bard, E., & Rostek, F. (1998). Tropical sea-surface temperatures during the last glacial period: A view based on alkenones in Indian Ocean sediments. *Quaternary Science Reviews*, 17(12), 1185–1201.
- Steinke, S., Glatz, C., Mohtadi, M., Groeneveld, J., Li, Q., & Jian, Z. (2011). Past dynamics of the East Asian monsoon: No inverse behaviour between the summer and winter monsoon during the Holocene. *Global and Planetary Change*, 78(3-4), 170–177. <https://doi.org/10.1016/j.gloplacha.2011.06.006>
- Steinke, S., Kienast, M., Groeneveld, J., Lin, L.-C., Chen, M.-T., & Rendle-Bühning, R. (2008). Proxy dependence of the temporal pattern of deglacial warming in the tropical South China Sea: toward resolving seasonality. *Quaternary Science Reviews*, 27(7-8), 688–700. 10.1016/j.quascirev.2007.12.003
- Steinke, S., Kienast, M., Pflaumann, U., Weinelt, M., & Statterger, K. (2001). A High-Resolution Sea-Surface Temperature Record from the Tropical South China Sea (16,500–3000 yr B.P.). *Quaternary Research*, 55(3), 352–362. <https://doi.org/10.1006/qres.2001.2235>
- Stott, L., Cannariato, K., Thunell, R., Haug, G. H., Koutavas, A., & Lund, S. (2004). Decline of surface temperature and salinity in the western tropical Pacific Ocean in the Holocene epoch. *Nature* 431, 56–59.
- Stott, L., Poulsen, C. J., Lund, D. C., & Thunell, R. (2002). Super ENSO and global climate oscillations at millennial time scales. *Science*, 297, 222–229.
- Stott, L., Timmermann, A., & Thunell, R. (2007). Southern Hemisphere and deep-sea warming led deglacial atmospheric CO<sub>2</sub> rise and tropical warming. *Science*, 318(5849), 435–438. <https://doi.org/10.1126/science.1143791>
- Sun, Y., Oppo, D. W., Xiang, R., Liu, W., & Gao, S. (2005). Last deglaciation in the Okinawa Trough: Subtropical northwest Pacific link to Northern Hemisphere and tropical climate. *Paleoceanography*, 20(4), <https://doi.org/10.1029/2004pa001061>
- Tachikawa, K., Timmermann, A., Vidal, L., Sonzogni, C., & Timm, O. E. (2014). CO<sub>2</sub> radiative forcing and Intertropical Convergence Zone influences on western Pacific warm pool climate over the past 400 ka. *Quaternary Science Reviews*, 86(0), 24–34. <https://doi.org/10.1016/j.quascirev.2013.12.018>
- Tachikawa, K., Vidal, L., Sonzogni, C., & Bard, E. (2009). Glacial/interglacial sea surface temperature changes in the Southwest Pacific ocean over the past 360ka. *Quaternary Science Reviews*, 28(13-14), 1160–1170. <https://doi.org/10.1016/j.quascirev.2008.12.013>
- Tierney, J. E., Pausata, F. S. R., & deMenocal, P. (2016). Deglacial Indian monsoon failure and North Atlantic stadials linked by Indian Ocean surface cooling. *Nature Geoscience*, 9(1), 46–50. <https://doi.org/10.1038/ngeo2603>
- Tierney, J. E., & Tingley, M. P. (2018). BAYSPLINE: A New Calibration for the Alkenone Paleothermometer. *Paleoceanography and Paleoclimatology*, 33, 281–301. <https://doi.org/10.1002/2017PA003201>
- Turney, C. S. M., Jones, R. T., McKay, N. P., Van Sebille, E., Thomas, Z., Hillenbrand, C.-D., & Fogwill, C. J. (2020). A global mean sea surface temperature dataset for the Last Interglacial (129–116 ka) and contribution of thermal expansion to sea level change. *Earth System Science Data*, 12, 3341–3356. <https://doi.org/10.5194/essd-12-3341-2020>
- Wang, L., Sarnthein, M., Erlenkeuser, H., Grimalt, J. O., Grootes, P. M., Heilig, S., . . . Pflaumann, U. (1999). East Asian monsoon climate during the Late Pleistocene: high-resolution sediment records from the South China Sea. *Marine Geology*, 156(1-4), 245–284. [https://doi.org/10.1016/S0025-3227\(98\)00182-0](https://doi.org/10.1016/S0025-3227(98)00182-0)
- Wang, X., Jian, Z., Lückge, A., Wang, Y., Dang, H., & Mohtadi, M. (2018). Precession-paced thermocline water temperature changes in response to upwelling conditions off southern Sumatra over the past 300,000 years. *Quaternary Science Reviews*, 192, 123–134. <https://doi.org/10.1016/j.quascirev.2018.05.035>

- Wang, Y. V., Leduc, G., Regenberg, M., Andersen, N., Larsen, T., Blanz, T., & Schneider, R. R. (2013). Northern and southern hemisphere controls on seasonal sea surface temperatures in the Indian Ocean during the last deglaciation. *Paleoceanography*, 28(4), 619–632. <https://doi.org/10.1002/palo.20053>
- Weiss, T. L., Linsley, B. K., Gordon, A. L., Rosenthal, Y., & Dannenmann-Di Palma, S. (2022). Constraints on Marine Isotope Stage 3 and 5 Sea Level From the Flooding History of the Karimata Strait in Indonesia. *Paleoceanography and Paleoclimatology*, 37(9), e2021PA004361. <https://doi.org/10.1029/2021PA004361>
- Windler, G., Tierney, J. E., Di Nezio, P. N., Gibson, K., & Thunell, R. (2019). Shelf exposure influence on Indo-Pacific Warm Pool climate for the last 450,000 years. *Earth and Planetary Science Letters*, 516, 66–76. <https://doi.org/10.1016/j.epsl.2019.03.038>
- Xu, J., Holbourn, A., Kuhnt, W., Jian, Z., & Kawamura, H. (2008). Changes in the thermocline structure of the Indonesian outflow during Terminations I and II. *Earth and Planetary Science Letters*, 273(1-2), 152–162. <https://doi.org/10.1016/j.epsl.2008.06.029>
- Xu, J., Kuhnt, W., Holbourn, A., Andersen, N., & Bartoli, G. (2006). Changes in the vertical profile of the Indonesian Throughflow during Termination II: Evidence from the Timor Sea. *Paleoceanography*, 21(4). <https://doi.org/10.1029/2006pa001278>
- Yamamoto, M., Oba, T., Shimamune, J., & Ueshima, T. (2004). Orbital-scale anti-phase variation of sea surface temperature in mid-latitude North Pacific margins during the last 145,000 years. *Geophysical Research Letters*, 31(16). <https://doi.org/10.1029/2004gl020138>
- Yamamoto, M., Suemune, R., & Oba, T. (2005). Equatorward shift of the subarctic boundary in the northwestern Pacific during the last deglaciation. *Geophysical Research Letters*, 32(5), L05609. <https://doi.org/10.1029/2004GL021903>
- Yamamoto, M., Yamamuro, M., & Tanaka, Y. (2007). The California current system during the last 136,000 years: response of the North Pacific High to precessional forcing. *Quaternary Science Reviews*, 26(3), 405–414. <https://doi.org/10.1016/j.quascirev.2006.07.014>
- Zhang, S., Li, T., Chang, F., Yu, Z., Xiong, Z., & Wang, H. (2017). Correspondence between the ENSO-like state and glacial-interglacial condition during the past 360 kyr. *Chinese Journal of Oceanology and Limnology*, 35(5), 1018–1031. <https://doi.org/10.1007/s00343-017-6082-9>
- Zhang, S., Yu, Z., Gong, X., Wang, Y., Chang, F., Lohmann, G., . . . Li, T. (2021). Precession cycles of the El Niño/Southern oscillation-like system controlled by Pacific upper-ocean stratification. *Communications Earth & Environment*, 2(239). <https://doi.org/10.1038/s43247-021-00305-5>
- Zhao, M., Huang, C.-Y., Wang, C.-C., & Wei, G. (2006). A millennial-scale U37K' sea-surface temperature record from the South China Sea (8°N) over the last 150 kyr: Monsoon and sea-level influence. *Palaeogeography, Palaeoclimatology, Palaeoecology*, 236(1-2), 39–55. <https://doi.org/10.1016/j.palaeo.2005.11.033>
- Zuraida, R., Holbourn, A., Nürnberg, D., Kuhnt, W., Dürkop, A., & Erichsen, A. (2009). Evidence for Indonesian Throughflow slowdown during Heinrich events 3-5. *Paleoceanography*, 24(2). <https://doi.org/10.1029/2008pa001653>
